# Supplementary material for: Subcellular drug targeting illuminates local kinase action
Source: eLife. 2019 Dec 24;8:e52220. doi: 10.7554/eLife.52220 (PMC6930117; doi:10.7554/eLife.52220)
Supplement: Figure 2—figure supplement 2—source data 1. [file elife-52220-fig2-figsupp2-data1.xlsx]

## Sheet: PACT_CLPBI_Timcourse
U2OS SNAP-PACT cells treated with CLP-BI2536 for 1 or 2 hr followed by CLP-rhodamine
Exp 1		Gel	WB	Normalization	Normalized Gel Signal	Normalized to DMSO			Ex 1-3
1 hr	DMSO	41885.2	4515.45	1	41885.2	1						% Rhodamine Labeling	% CLP-BI2536 Labeling	SEM
	100 nM	40639.3	4891.03	1.08318	37518.6	0.895748		1 hr	DMSO	1	0	100	0	0
	250 nM	46036.9	6065.03	1.34317	34274.7	0.818301			100 nM	0.97236	0.0446315	97.236	2.76397	4.46315
	500 nM	46227.9	6461.5	1.43098	32305.1	0.771278			250 nM	0.913251	0.0499242	91.3251	8.6749	4.99242
2 hr	DMSO	41743.8	4766.86	1	41743.8	1			500 nM	0.851519	0.06677	85.1519	14.8481	6.677
	100 nM	39485.8	5243.69	1.10003	35895.2	0.859894		2 hr	DMSO	1	0	100	0	0
	250 nM	42514.1	6484.5	1.36033	31252.8	0.748683			100 nM	0.998739	0.0954249	99.8739	0.1261	9.54249
	500 nM	30272.5	4527.2	0.949725	31875	0.763588			250 nM	0.887672	0.0718398	88.7672	11.2328	7.18398
Exp 2									500 nM	0.91912	0.10808	91.912	8.08797	10.808
1 hr	DMSO	40349.5	6888.28	1	40349.5	1
	100 nM	41645.9	7321.98	1.06296	39179.1	0.970994
	250 nM	35887	6559.57	0.95228	37685.3	0.933973
	500 nM	37688.2	8050.52	1.16873	32247.2	0.799197
2 hr	DMSO	39842.3	6700.1	1	39842.3	1
	100 nM	45342.5	7986.35	1.19197	38039.9	0.954763
	250 nM	32950.5	5986.35	0.893471	36879.2	0.925631
	500 nM	24291.7	4712.33	0.703321	34538.6	0.866883
Exp 3
1 hr	DMSO	53248.2	7746.1	1	53248.2	1
	100 nM	52483.4	7268.93	0.938399	55928.7	1.05034
	250 nM	50212.9	7397.18	0.954954	52581.5	0.987479
	500 nM	34365	5079.98	0.655811	52400.7	0.984083
2 hr	DMSO	51316.3	8641.8	1	51316.3	1
	100 nM	42676.8	6082.54	0.703851	60633.3	1.18156
	250 nM	42347.6	7212.95	0.834658	50736.5	0.988701
	500 nM	46725.6	6982.69	0.808013	57827.8	1.12689
