# Supplementary material for: Subcellular drug targeting illuminates local kinase action
Source: eLife. 2019 Dec 24;8:e52220. doi: 10.7554/eLife.52220 (PMC6930117; doi:10.7554/eLife.52220)
Supplement: Figure 2—source data 1. [file elife-52220-fig2-data1.xlsx]

## Sheet: PACT_CLPBI_Dose-res
U2OS SNAP-PACT cells treated with CLP-BI2536 for 4 hr followed by CLP-rhodamine
		Gel	WB	Normalization	Normalized Gel Signal	Normalized to DMSO	% Rhodamine Labeling	% CLP-BI2536 Labeling		Ex 1-3
Exp 1	DMSO	18714.2	1578.18	1	18714.2	1	100	0					% Rhodamine Labeling	% CLP-BI2536 Labeling	SEM
	100 nM	35200.4	5317.78	3.36956	10446.6	0.558219	55.8219	44.1781		DMSO	1	0	100	0	0
	250 nM	34404.8	6641.59	4.20837	8175.32	0.436852	43.6852	56.3148		100 nM	0.63956	0.111146	63.956	36.044	11.1146
	500 nM	31697.7	7502.2	4.75369	6668.03	0.356309	35.6309	64.3691		250 nM	0.548892	0.112241	54.8892	45.1108	11.2241
	1 uM	12778.7	3721.22	2.35792	5419.47	0.289592	28.9592	71.0408		500 nM	0.429103	0.0560606	42.9103	57.0897	5.60606
Exp 2	DMSO	34798.1	3061.54	1	34798.1	1	100	0		1 uM	0.271677	0.0597496	27.1677	72.8323	5.97496
	100 nM	40370.3	7088.35	2.31529	17436.4	0.501073	50.1073	49.8927
	250 nM	39785.7	8020.05	2.61962	15187.6	0.436449	43.6449	56.3551
	500 nM	26934.2	6050.52	1.9763	13628.6	0.391648	39.1648	60.8352
	1 uM	12402.5	6802.81	2.22202	5581.63	0.1604	16.04	83.96
Exp 3	DMSO	39537.8	8054.88	1	39537.8	1	100	0
	100 nM	39480.4	9359.2	1.16193	33978.3	0.85939	85.939	14.061
	250 nM	40936.6	10783.7	1.33878	30577.5	0.773375	77.3375	22.6625
	500 nM	20105.7	7594.42	0.942834	21324.8	0.539352	53.9352	46.0648
	1 uM	15449	8621.95	1.0704	14432.9	0.36504	36.504	63.496
