# Supplementary material for: Subcellular drug targeting illuminates local kinase action
Source: eLife. 2019 Dec 24;8:e52220. doi: 10.7554/eLife.52220 (PMC6930117; doi:10.7554/eLife.52220)
Supplement: Figure 2—source data 2. [file elife-52220-fig2-data2.xlsx]

## Sheet: pT210Plk1_ex1
			Area	Mean	Min	Max	IntDen	RawIntDen	Avg RawIntDen	ARID-Background	ARID-Background Avg Signal	by avg LoKI-on dmso	by avg LoKI-off dmso
LoKI-on	Image 1	Pole	0.512	230952	207661	252073	118248	18476179	18130737	384635	642646	0.116562	0.0987317
250 nM		Pole	0.512	222316	201602	244361	113826	17785295
		Background	0.512	221826	201717	245560	113575	17746102
	Image 2	Pole	0.512	189581	166346	211439	97065.6	15166500	1.39661e+07	600134		0.181868	0.154048
		Pole	0.512	159570	138300	189425	81700	12765629
		Background	0.512	167074	148284	187450	85542	13365931
	Image 3	Pole	0.512	123703	100454	157080	63335.9	9896238	1.10841e+07	0		0	0
		Pole	0.512	153399	122109	191600	78540.5	12271951
		Background	0.512	161682	149870	183164	82781.4	12934599
	Image 4	Pole	0.512	97159.4	86857	119876	49745.6	7772750	7340921	0		0	0
		Pole	0.512	86363.6	65860	114723	44218.2	6909092
		Background	0.512	96357.7	84992	107387	49335.1	7708616
	Image 5	Pole	0.512	76858.8	56649	104407	39351.7	6148701	6.78374e+06	904584		0.274131	0.232197
		Pole	0.512	92734.7	69271	113159	47480.2	7418776
		Background	0.512	73489.4	64375	81905	37626.6	5879154
	Image 6	Pole	0.512	99753.1	68982	125937	51073.6	7980249	7358280	1239100		0.375504	0.318064
		Pole	0.512	84203.9	72517	95923	43112.4	6736311
		Background	0.512	76489.8	60270	92499	39162.8	6119180
	Image 7	Pole	0.512	63905.2	48196	78615	32719.4	5112412	5352200	446724		0.135378	0.114669
		Pole	0.512	69899.9	62699	83887	35788.7	5591988
		Background	0.512	61318.4	52438	70105	31395	4905476
	Image 8	Pole	0.512	91589	63793	139653	46893.6	7327123	6.16103e+06	915680		0.277493	0.235045
		Pole	0.512	62436.8	36530	86297	31967.6	4994942
		Background	0.512	65566.9	58064	72967	33570.3	5245352
	Image 9	Pole	0.512	80699.6	66537	94911	41318.2	6455971	5.83552e+06	1.33799e+06		0.405472	0.343447
		Pole	0.512	65188.4	47661	105235	33376.5	5215072
		Background	0.512	56219.2	46807	70050	28784.2	4497533
	Image 10	Pole	0.512	133329	104539	158101	68264.2	10666289	1.01169e+07	1.63149e+06		0.494416	0.418786
		Pole	0.512	119594	91002	146920	61231.9	9567488
		Background	0.512	106067	95880	126006	54306.6	8485399
	Image 11	Pole	0.512	92700.1	77996	121079	47462.4	7416007	7.14391e+06	276588		0.083819	0.0709973
		Pole	0.512	85897.8	73539	105532	43979.6	6871820
		Background	0.512	85841.6	72340	95195	43950.9	6867325
	Image 12	Pole	0.512	60598.6	45998	88340	31026.5	4847884	5.61363e+06	0		0	0
		Pole	0.512	79742.2	60664	100255	40828	6379373
		Background	0.512	79880.6	68155	90441	40898.9	6390451
	Image 13	Pole	0.512	78883.5	63944	91943	40388.4	6310683	5846615	828508		0.251076	0.212669
		Pole	0.512	67281.8	50656	80854	34448.3	5382547
		Background	0.512	62726.3	47857	71109	32115.9	5018107
	Image 14	Pole	0.512	66523.6	53395	83565	34060.1	5321889	5.28435e+06	1.05018e+06		0.318253	0.26957
		Pole	0.512	65585	46643	97704	33579.5	5246802
		Background	0.512	52927.1	39845	67518	27098.7	4234164
	Image 15	Pole	0.512	112711	93444	127486	57707.8	9016846	8700049	1451437		0.439852	0.372568
		Pole	0.512	104791	89676	119912	53652.8	8383252
		Background	0.512	90607.6	80213	103215	46391.1	7248612
	Image 16	Pole	0.512	50146.6	27052	92692	25675.1	4011727	3.92014e+06	128650		0.038987	0.0330232
		Pole	0.512	47856.9	33226	67987	24502.7	3828554
		Background	0.512	47393.6	36297	56212	24265.5	3791490
	Image 17	Pole	0.512	57080.1	42825	75596	29225	4566409	4.3481e+06	0		0	0
		Pole	0.512	51622.3	44552	63849	26430.6	4129782
		Background	0.512	57665.7	42806	68457	29524.9	4613258
	Image 18	Pole	0.512	55220.2	40174	80775	28272.8	4417620	3.97884e+06	930726		0.282052	0.238907
		Pole	0.512	44250.8	32521	66174	22656.4	3540067
		Background	0.512	38101.5	30692	46459	19508	3048118
	Image 19	Pole	0.512	43072.4	23786	71600	22053.1	3445792	3224912	726494		0.220161	0.186483
		Pole	0.512	37550.4	22899	65136	19225.8	3004032
		Background	0.512	31230.2	24308	36529	15989.9	2498418
	Image 20	Pole	0.512	69392.7	50474	83368	35529.1	5551415	5675351	0		0	0
		Pole	0.512	72491.1	63784	89961	37115.4	5799287
		Background	0.512	71891.1	60091	79291	36808.2	5751284
LoKI-on	Image 1	Pole	0.512	162135	130875	199586	83012.9	12970762	14317389	2882178	3.29983e+06	0.873432	0.739824
DMSO		Pole	0.512	195800	151739	238517	100250	15664016
		Background	0.512	142940	120866	167383	73185.4	11435211
	Image 2	Pole	0.512	130574	106946	162858	66854	10445942	10768016	4006485		1.21415	1.02842
		Pole	0.512	138626	94787	191372	70976.6	11090090
		Background	0.512	84519.1	69942	103956	43273.8	6761531
	Image 3	Pole	0.512	172901	127436	221535	88525.2	13832055	11860987	3580543		1.08507	0.919087
		Pole	0.512	123624	94191	154329	63295.5	9889919
		Background	0.512	103506	90079	118030	52994.8	8280444
	Image 4	Pole	0.512	147358	98284	216047	75447.1	11788611	1.17587e+07	3.30987e+06		1.00304	0.849608
		Pole	0.512	146610	113214	194589	75064.5	11728832
		Background	0.512	105611	84066	119865	54072.7	8448853
	Image 5	Pole	0.512	124391	82705	168768	63688.1	9951258	8.65657e+06	1.88641e+06		0.571669	0.484222
		Pole	0.512	92023.6	63290	128109	47116.1	7361885
		Background	0.512	84627	76628	98359	43329	6770159
	Image 6	Pole	0.512	129498	79406	178387	66303.2	10359876	10059214	4320637		1.30935	1.10906
		Pole	0.512	121982	65721	181577	62454.7	9758552
		Background	0.512	71732.2	48590	97714	36726.9	5738577
	Image 7	Pole	0.512	135472	96384	171646	69361.5	10837731	10474063	3380459		1.02443	0.867728
		Pole	0.512	126380	94363	179898	64706.5	10110395
		Background	0.512	88670.1	73435	99466	45399.1	7093604
	Image 8	Pole	0.512	121397	93581	168745	62155.5	9711795	9556069	3333572		1.01023	0.855692
		Pole	0.512	117504	67430	166093	60162.2	9400343
		Background	0.512	77781.2	60107	98309	39824	6222497
	Image 9	Pole	0.512	124067	79661	163799	63522.4	9925370	9.00425e+06	3.0816e+06		0.933866	0.791014
		Pole	0.512	101039	63971	156046	51732.1	8083133
		Background	0.512	74033.1	64754	82960	37905	5922650
	Image 10	Pole	0.512	144078	104691	197096	73767.9	11526236	1.00034e+07	3.1197e+06		0.945411	0.800793
		Pole	0.512	106007	79247	139031	54275.5	8480549
		Background	0.512	86046.2	76890	100749	44055.7	6883697
	Image 11	Pole	0.512	71728	38667	110930	36724.8	5738243	9.28206e+06	1.44063e+06		0.436578	0.369795
		Pole	0.512	160323	114630	226353	82085.6	12825872
		Background	0.512	98017.8	86711	108945	50185.1	7841424
	Image 12	Pole	0.512	107607	68354	157140	55094.9	8608582	1.01793e+07	2.91694e+06		0.883966	0.748747
		Pole	0.512	146875	101252	195167	75200.2	11750029
		Background	0.512	90779.6	75744	102993	46479.1	7262367
	Image 13	Pole	0.512	187680	116686	288459	96091.9	15014366	15143036	4984799		1.51062	1.27954
		Pole	0.512	190896	133689	239305	97738.9	15271706
		Background	0.512	126978	106737	149948	65012.7	10158237
	Image 14	Pole	0.512	79491.8	38646	133758	40699.8	6359346	6007134	2328733		0.705713	0.597761
		Pole	0.512	70686.5	39560	116059	36191.5	5654922
		Background	0.512	45980	38523	51536	23541.8	3678401
	Image 15	Pole	0.512	157186	109383	217983	80479	12574849	1.15402e+07	4.93921e+06		1.49681	1.26784
		Pole	0.512	131319	86895	194109	67235.4	10505526
		Background	0.512	82512.3	66367	99164	42246.3	6600981
	Image 16	Pole	0.512	184938	143262	261671	94688.5	14795074	13198218	1777385		0.538629	0.456236
		Pole	0.512	145017	114148	202467	74248.7	11601362
		Background	0.512	142760	124203	168010	73093.3	11420833
	Image 17	Pole	0.512	177783	131914	214435	91025	14222651	12491853	4392431		1.33111	1.12749
		Pole	0.512	134513	101479	166988	68870.8	10761055
		Background	0.512	101243	82290	121915	51836.3	8099422
	Image 18	Pole	0.512	120669	86217	181484	61782.8	9653557	1.14501e+07	2.49805e+06		0.757023	0.641223
		Pole	0.512	165583	115910	224115	84778.4	13246630
		Background	0.512	111901	86249	134341	57293.1	8952044
	Image 19	Pole	0.512	145579	98736	194901	74536.6	11646345	11692054	4337728		1.31453	1.11345
		Pole	0.512	146722	98844	198480	75121.7	11737763
		Background	0.512	91929.1	76304	111632	47067.7	7354326
	Image 20	Pole	0.512	178249	142979	217721	91263.3	14259888	14239012	3479268		1.05438	0.893091
		Pole	0.512	177727	112351	238552	90996.1	14218136
		Background	0.512	134497	122848	155324	68862.4	10759744
LoKI-off	Image 1	Pole	0.512	140567	105641	196020	71970.3	11245364	9.99638e+06	4.11208e+06	2.38388e+06	1.24615	1.05553
250 nM		Pole	0.512	109342	75585	132365	55983.3	8747393
		Background	0.512	73553.7	66365	81686	37659.5	5884294
	Image 2	Pole	0.512	166866	124576	222449	85435.5	13349296	1.26046e+07	3.2778e+06		0.993323	0.841376
		Pole	0.512	148249	110852	210757	75903.3	11859891
		Background	0.512	116585	102475	133869	59691.5	9326796
	Image 4	Pole	0.512	153357	131282	191721	78518.6	12268539	12620306	1512311		0.4583	0.388194
		Pole	0.512	162151	138916	181949	83021.3	12972073
		Background	0.512	138850	129226	149743	71091.2	11107995
	Image 5	Pole	0.512	67574.9	39932	93994	34598.4	5405996	5075070	1500765		0.454801	0.38523
		Pole	0.512	59301.8	35596	80846	30362.5	4744144
		Background	0.512	44678.8	39705	53056	22875.6	3574305
	Image 6	Pole	0.512	128132	98277	162309	65603.8	10250592	11548042	2402051		0.727931	0.616581
		Pole	0.512	160569	116020	230727	82211.1	12845492
		Background	0.512	114325	106088	122802	58534.3	9145991
	Image 7	Pole	0.512	79117.7	55269	100877	40508.3	6329418	7.15624e+06	2.2332e+06		0.676761	0.573238
		Pole	0.512	99788.2	55710	161682	51091.6	7983055
		Background	0.512	61538	54707	70493	31507.4	4923038
	Image 8	Pole	0.512	104391	60683	136997	53448.1	8351269	7.99224e+06	2.6768e+06		0.811194	0.687107
		Pole	0.512	95415.2	66500	131641	48852.6	7633216
		Background	0.512	66443	52808	80234	34018.8	5315438
	Image 9	Pole	0.512	129729	107282	152663	66421.3	10378323	11311243	2439659		0.739328	0.626234
		Pole	0.512	153052	101067	189802	78362.6	12244163
		Background	0.512	110895	92670	124687	56778.1	8871584
	Image 10	Pole	0.512	106186	80346	145089	54367.4	8494900	9040996	3649082		1.10584	0.93668
		Pole	0.512	119839	84946	150045	61357.4	9587092
		Background	0.512	67398.9	52606	77863	34508.2	5391914
	Image 11	Pole	0.512	108545	88040	141473	55575.1	8683611	8484513	1934466		0.586232	0.496557
		Pole	0.512	103568	69805	135437	53026.7	8285415
		Background	0.512	81875.6	70486	94638	41920.3	6550047
	Image 12	Pole	0.512	160534	129020	200622	82193.3	12842698	1.17798e+07	2.33064e+06		0.706292	0.598251
		Pole	0.512	133962	89245	187771	68588.8	10716993
		Background	0.512	118115	107972	134259	60474.9	9449202
	Image 13	Pole	0.512	67283.5	52388	81905	34449.1	5382678	6514060	2006864		0.608172	0.515141
		Pole	0.512	95568	66837	137676	48930.8	7645442
		Background	0.512	56339.9	42865	68074	28846.1	4507196
	Image 14	Pole	0.512	105666	76138	153269	54100.8	8453253	6661719	2194880		0.665149	0.563402
		Pole	0.512	60877.3	40186	84666	31169.2	4870185
		Background	0.512	55835.5	43082	71058	28587.8	4466839
	Image 15	Pole	0.512	113156	84751	152417	57935.9	9052477	9119763	3062996		0.928228	0.786238
		Pole	0.512	114838	83143	169950	58797.1	9187049
		Background	0.512	75709.6	65865	90206	38763.3	6056767
	Image 16	Pole	0.512	30004.7	24550	37739	15362.4	2400375	2669246	188700		0.0571847	0.0484373
		Pole	0.512	36726.5	28504	44829	18803.9	2938117
		Background	0.512	31006.8	27475	38963	15875.5	2480546
	Image 17	Pole	0.512	69835.1	59567	82113	35755.6	5586807	7088083	1499440		0.454399	0.38489
		Pole	0.512	107367	69161	160768	54971.9	8589359
		Background	0.512	69858	61810	80886	35767.3	5588643
	Image 18	Pole	0.512	85201.9	44915	128521	43623.4	6816153	7.17513e+06	2.27945e+06		0.690778	0.585111
		Pole	0.512	94176.4	60661	131015	48218.3	7534114
		Background	0.512	61196	50366	73472	31332.4	4895683
	Image 19	Pole	0.512	108291	85072	133142	55445.1	8663298	9.35306e+06	3.75865e+06		1.13904	0.964804
		Pole	0.512	125535	85053	159860	64274.1	10042825
		Background	0.512	69930.2	60204	78628	35804.3	5594416
	Image 20	Pole	0.512	86032.9	51989	119113	44048.8	6882631	9252259	2233903		0.676975	0.573419
		Pole	0.512	145274	91622	200345	74380.1	11621887
		Background	0.512	87729.4	77533	99483	44917.5	7018356
LoKI-off	Image 1	Pole	0.512	171634	131358	220247	87876.4	13730692	13857593	3952969	3.89576e+06	1.19793	1.01468
DMSO		Pole	0.512	174806	109911	219334	89500.8	13984494
		Background	0.512	123808	108006	136764	63389.6	9904624
	Image 2	Pole	0.512	112415	77477	163652	57556.7	8993228	8.29591e+06	4.27262e+06		1.2948	1.09674
		Pole	0.512	94982.5	62110	146584	48631	7598601
		Background	0.512	50291.2	44620	59322	25749.1	4023297
	Image 3	Pole	0.512	139285	93365	180126	71314	11142809	1.10474e+07	4.22416e+06		1.28011	1.0843
		Pole	0.512	136901	96544	167311	70093.4	10952086
		Background	0.512	85291.1	78342	92531	43669.1	6823291
	Image 4	Pole	0.512	140292	89420	183058	71829.4	11223339	11075122	3174149		0.961913	0.81477
		Pole	0.512	136586	87491	201640	69932.2	10926905
		Background	0.512	98762.2	83877	114669	50566.2	7900973
	Image 5	Pole	0.512	151899	119377	172980	77772.1	12151887	9.96352e+06	4.22355e+06		1.27993	1.08414
		Pole	0.512	97189.5	69893	126931	49761	7775160
		Background	0.512	71749.7	61467	88978	36735.9	5739978
	Image 6	Pole	0.512	165074	131719	205007	84518.1	13205958	9.83812e+06	4.5607e+06		1.3821	1.17068
		Pole	0.512	80878.4	37334	138931	41409.8	6470275
		Background	0.512	65967.7	56761	84431	33775.4	5277413
	Image 7	Pole	0.512	19258.5	11101	28876	9860.33	1540676	1.47259e+06	811346		0.245875	0.208264
		Pole	0.512	17556.2	9753	27439	8988.77	1404495
		Background	0.512	8265.5	6848	10691	4231.94	661240
	Image 8	Pole	0.512	162687	102558	214708	83295.6	13014943	12006745	5565461		1.68659	1.42859
		Pole	0.512	137482	86508	181103	70390.7	10998547
		Background	0.512	80516.1	69936	96117	41224.2	6441284
	Image 9	Pole	0.512	152985	111201	205300	78328.4	12238813	1.30608e+07	3.89197e+06		1.17945	0.999027
		Pole	0.512	173534	127334	211467	88849.5	13882734
		Background	0.512	114610	95213	133534	58680.3	9168804
	Image 11	Pole	0.512	167017	92558	273560	85512.5	13361332	13972665	3169237		0.960424	0.813509
		Pole	0.512	182300	133084	227569	93337.6	14583998
		Background	0.512	135043	120727	154202	69141.9	10803428
	Image 12	Pole	0.512	85840.8	55933	139869	43950.5	6867262	5992357	1782821		0.540276	0.457631
		Pole	0.512	63968.2	37067	98695	32751.7	5117452
		Background	0.512	52619.2	48203	61945	26941	4209536
	Image 13	Pole	0.512	138899	86982	186069	71116.3	11111919	10878486	4481987		1.35825	1.15048
		Pole	0.512	133063	89712	174453	68128.3	10645053
		Background	0.512	79956.2	66243	93646	40937.6	6396499
	Image 14	Pole	0.512	178002	125478	230079	91137.1	14240173	1.2579e+07	6.00898e+06		1.821	1.54244
		Pole	0.512	136473	89964	188471	69874.1	10917830
		Background	0.512	82125.3	75431	92028	42048.1	6570023
	Image 15	Pole	0.512	103946	60226	137414	53220.3	8315679	8546418	4420701		1.33967	1.13475
		Pole	0.512	109714	66259	158025	56173.8	8777157
		Background	0.512	51571.5	43570	63259	26404.6	4125717
LoKI-on	Image 1	Pole	0.512	30916.9	22975	39786	15829.4	2473349	2870007	578951	1.07312e+06	0.175449	0.148611
100 nM		Pole	0.512	40833.3	28485	50722	20906.7	3266665
		Background	0.512	28638.2	24496	34551	14662.8	2291056
	Image 2	Pole	0.512	50954.6	43246	59954	26088.8	4076371	4.03961e+06	531464		0.161058	0.136421
		Pole	0.512	50035.5	31499	67489	25618.2	4002842
		Background	0.512	43851.8	38259	52550	22452.1	3508142
	Image 3	Pole	0.512	78273.9	53145	118744	40076.2	6261913	5416951	2090003		0.633367	0.536481
		Pole	0.512	57149.9	34542	87679	29260.7	4571989
		Background	0.512	41586.8	35982	53471	21292.5	3326948
	Image 4	Pole	0.512	80239.1	52587	102365	41082.4	6419130	5215887	1435708		0.435085	0.368531
		Pole	0.512	50158.1	31888	62455	25680.9	4012644
		Background	0.512	47252.2	36931	55373	24193.1	3780179
	Image 5	Pole	0.512	50202.8	38442	71294	25703.9	4016227	4274581	588358		0.178299	0.151025
		Pole	0.512	56661.7	34035	95478	29010.8	4532935
		Background	0.512	46077.8	36582	56422	23591.8	3686223
	Image 6	Pole	0.512	75203.3	57675	97448	38504.1	6016265	5824488	933909		0.283017	0.239724
		Pole	0.512	70408.9	53876	108940	36049.3	5632711
		Background	0.512	61132.2	53062	67485	31299.7	4890579
	Image 7	Pole	0.512	75307.5	51703	94352	38557.4	6024597	5279579	1456856		0.441494	0.373959
		Pole	0.512	56682	27412	98373	29021.2	4534561
		Background	0.512	47784	39886	58032	24465.4	3822723
	Image 8	Pole	0.512	102765	89531	122923	52615.6	8221191	7.77506e+06	527754		0.159934	0.135469
		Pole	0.512	91611.6	66678	125578	46905.1	7328926
		Background	0.512	90591.3	80068	99346	46382.7	7247304
	Image 9	Pole	0.512	65080.2	57001	78948	33321.1	5206417	4.97287e+06	839200		0.254316	0.215414
		Pole	0.512	59241.6	45863	76030	30331.7	4739326
		Background	0.512	51670.9	42632	68768	26455.5	4133671
	Image 10	Pole	0.512	112892	89123	141713	57800.9	9031390	7251726	1166525		0.353511	0.299435
		Pole	0.512	68400.8	51936	115100	35021.2	5472062
		Background	0.512	76065	59819	98143	38945.3	6085201
	Image 11	Pole	0.512	55762.3	41237	72442	28550.3	4460984	4997756	23574		0.007144	0.00605119
		Pole	0.512	69181.6	56666	100121	35421	5534528
		Background	0.512	62177.3	48498	72377	31834.8	4974182
	Image 12	Pole	0.512	84891.6	62749	107157	43464.5	6791327	6211962	1597536		0.484127	0.41007
		Pole	0.512	70407.5	53145	96628	36048.6	5632597
		Background	0.512	57680.3	50969	63533	29532.3	4614426
	Image 13	Pole	0.512	95008.7	74683	115700	48644.5	7600696	7490816	1066047		0.323061	0.273643
		Pole	0.512	92261.7	71750	121291	47238	7380936
		Background	0.512	80309.6	72591	91170	41118.5	6424769
	Image 14	Pole	0.512	54280.2	41973	75947	27791.4	4342413	4.9455e+06	0		0	0
		Pole	0.512	69357.3	60031	85021	35510.9	5548586
		Background	0.512	70878.5	60533	85065	36289.8	5670279
	Image 15	Pole	0.512	77189	48896	112951	39520.8	6175122	6.76013e+06	2.23956e+06		0.67869	0.574872
		Pole	0.512	91814.3	60839	128212	47008.9	7345145
		Background	0.512	56507.1	48901	73217	28931.7	4520571
	Image 16	Pole	0.512	76349.2	57510	99475	39090.8	6107938	6.00564e+06	1.59777e+06		0.484197	0.41013
		Pole	0.512	73791.8	61426	93503	37781.4	5903345
		Background	0.512	55098.4	39335	72739	28210.4	4407873
	Image 17	Pole	0.512	65797.8	45691	95426	33688.5	5263825	6438174	1644193		0.498266	0.422047
		Pole	0.512	95156.5	62861	141463	48720.1	7612523
		Background	0.512	59924.8	50640	74308	30681.5	4793981
	Image 18	Pole	0.512	72568.5	52463	97483	37155.1	5805479	5.74605e+06	1.39727e+06		0.423436	0.358663
		Pole	0.512	71082.8	51975	92199	36394.4	5686624
		Background	0.512	54359.8	43001	62910	27832.2	4348785
	Image 19	Pole	0.512	77800.5	56002	114012	39833.9	6224040	5.94131e+06	1.38609e+06		0.42005	0.355796
		Pole	0.512	70732.2	54726	100372	36214.9	5658579
		Background	0.512	56940.2	49209	68242	29153.4	4555215
	Image 20	Pole	0.512	56197.8	42389	71890	28773.2	4495820	4584520	361551		0.109567	0.0928063
		Pole	0.512	58415.2	42597	75596	29908.6	4673220
		Background	0.512	52787.1	44754	61367	27027	4222969
LoKI-off	Image 1	Pole	0.512	123451	85741	152422	63207.1	9876110	8.71116e+06	2.7218e+06	3.14362e+06	0.82483	0.698657
100 nM		Pole	0.512	94327.7	51458	132234	48295.8	7546219
		Background	0.512	74867.1	59031	94040	38331.9	5989365
	Image 2	Pole	0.512	147270	105993	194941	75402.1	11781571	9.88923e+06	4.39441e+06		1.33171	1.128
		Pole	0.512	99961.1	55195	153131	51180.1	7996890
		Background	0.512	68685.2	55745	82775	35166.8	5494820
	Image 3	Pole	0.512	96852.6	68239	127938	49588.5	7748209	7.65469e+06	2.81301e+06		0.852472	0.72207
		Pole	0.512	94514.8	53510	127528	48391.6	7561180
		Background	0.512	60521	54072	65885	30986.8	4841682
	Image 4	Pole	0.512	150879	116955	184450	77249.9	12070297	1.28285e+07	3.24219e+06		0.982532	0.832235
		Pole	0.512	169835	135037	218727	86955.5	13586798
		Background	0.512	119829	103079	135702	61352.7	9586359
	Image 5	Pole	0.512	118785	93441	149739	60817.7	9502770	9.11163e+06	1.8683e+06		0.56618	0.479572
		Pole	0.512	109006	79657	133677	55811.2	8720499
		Background	0.512	90541.7	78545	102620	46357.4	7243337
	Image 6	Pole	0.512	170481	128090	227072	87286.2	13638470	14290295	2979972		0.903068	0.764927
		Pole	0.512	186776	123622	260103	95629.6	14942120
		Background	0.512	141379	128908	156541	72386.1	11310323
	Image 7	Pole	0.512	133657	89792	174006	68432.5	10692583	1.058e+07	3.19756e+06		0.969006	0.820779
		Pole	0.512	130843	83240	172322	66991.5	10467424
		Background	0.512	92280.6	82877	102143	47247.7	7382447
	Image 8	Pole	0.512	123054	82059	150492	63003.8	9844339	9341078	5342759		1.6191	1.37143
		Pole	0.512	110473	57323	163665	56562	8837817
		Background	0.512	49979	42404	58709	25589.2	3998319
	Image 9	Pole	0.512	355278	315863	383913	181902	28422228	27419978	2476658		0.750541	0.635732
		Pole	0.512	330222	262516	400832	169073	26417728
		Background	0.512	311792	285943	348970	159637	24943320
	Image 10	Pole	0.512	207131	165052	261517	106051	16570444	1.5001e+07	4.33915e+06		1.31496	1.11381
		Pole	0.512	167895	133022	204473	85962.5	13431637
		Background	0.512	133274	112231	148412	68236.1	10661886
	Image 11	Pole	0.512	182801	135894	240814	93593.9	14624041	16437407	2304594		0.698398	0.591565
		Pole	0.512	228135	156398	274271	116805	18250773
		Background	0.512	176660	150165	204491	90450	14132813
	Image 12	Pole	0.512	163028	130071	211772	83470.5	13042269	11508773	2553915		0.773953	0.655563
		Pole	0.512	124691	83130	165753	63841.8	9975277
		Background	0.512	111936	98445	125424	57311.1	8954858
	Image 13	Pole	0.512	210956	153414	263733	108010	16876499	1.69422e+07	2.6796e+06		0.812043	0.687826
		Pole	0.512	212600	166381	272513	108851	17007992
		Background	0.512	178283	153750	199885	91280.9	14262642
	Image 14	Pole	0.512	212891	180830	252954	109000	17031289	1.65342e+07	3.68097e+06		1.1155	0.944865
		Pole	0.512	200464	160590	242257	102638	16037152
		Background	0.512	160666	137101	184512	82260.8	12853255
	Image 15	Pole	0.512	171489	123859	209385	87802.2	13719098	1.32972e+07	3.16842e+06		0.960177	0.8133
		Pole	0.512	160941	119552	223510	82402	12875315
		Background	0.512	126610	113978	142460	64824.2	10128783
	Image 16	Pole	0.512	202544	153008	256440	103703	16203518	1.49931e+07	4.09673e+06		1.2415	1.05159
		Pole	0.512	172283	133136	233017	88209.1	13782667
		Background	0.512	136204	126665	152793	69736.7	10896359
	Image 17	Pole	0.512	287269	230330	338498	147081	22981482	2.59898e+07	278858		0.0845066	0.0715797
		Pole	0.512	362475	319513	399221	185587	28998035
		Background	0.512	321386	262436	357639	164550	25710901
	Image 18	Pole	0.512	163163	121369	191377	83539.4	13053037	14038296	4217158		1.27799	1.0825
		Pole	0.512	187794	129746	222567	96150.8	15023555
		Background	0.512	122764	108382	131969	62855.3	9821138
	Image 19	Pole	0.512	179794	139774	213904	92054.8	14383557	19387282	0		0	0
		Pole	0.512	304888	267307	339778	156102	24391007
		Background	0.512	262344	245960	281400	134320	20987515
	Image 20	Pole	0.512	186454	159010	217419	95464.3	14916297	13021163	974924		0.295447	0.250253
		Pole	0.512	139075	98149	161771	71206.6	11126029
		Background	0.512	150578	129800	167186	77095.9	12046239
	Image 21	Pole	0.512	385786	316954	459002	197522	30862887	30538125	8685059		2.63197	2.22936
		Pole	0.512	377667	277917	446440	193366	30213363
		Background	0.512	273163	225827	315092	139860	21853066
LoKI-on	Image 1	Pole	0.512	89876.2	75215	103325	46016.6	7190097	6618371	1746774	473266	0.529353	0.448378
500 nM		Pole	0.512	75583.1	54378	97550	38698.5	6046645
		Background	0.512	60895	52856	73756	31178.2	4871597
	Image 2	Pole	0.512	60552.4	38472	88255	31002.8	4844193	4116427	1138225		0.344934	0.29217
		Pole	0.512	42358.3	26190	72658	21687.4	3388661
		Background	0.512	37227.5	28484	44378	19060.5	2978202
	Image 3	Pole	0.512	58852.2	43281	81136	30132.3	4708179	4.17428e+06	0		0	0
		Pole	0.512	45504.7	36149	55350	23298.4	3640376
		Background	0.512	52499.2	43206	58391	26879.6	4199936
	Image 4	Pole	0.512	58056	42639	66862	29724.7	4644479	5.01661e+06	0		0	0
		Pole	0.512	67359.1	52969	80146	34487.9	5388732
		Background	0.512	74057.8	57142	87952	37917.6	5924625
	Image 5	Pole	0.512	67985.7	46475	82607	34808.7	5438858	6087924	65173		0.0197504	0.0167292
		Pole	0.512	84212.4	69054	98757	43116.7	6736990
		Background	0.512	75284.4	63833	94736	38545.6	6022751
	Image 6	Pole	0.512	53437.2	43919	59497	27359.8	4274975	3487710	81424		0.0246752	0.0209007
		Pole	0.512	33755.6	28163	39544	17282.8	2700445
		Background	0.512	42578.6	33764	51106	21800.2	3406286
	Image 7	Pole	0.512	35072	24924	51352	17956.9	2805761	2.70433e+06	306342		0.0928355	0.0786346
		Pole	0.512	32536.2	27028	37935	16658.5	2602894
		Background	0.512	29974.8	23230	36221	15347.1	2397986
	Image 8	Pole	0.512	43613.7	36457	50426	22330.2	3489099	3669253	403385		0.122244	0.103545
		Pole	0.512	48117.6	37757	68596	24636.2	3849407
		Background	0.512	40823.3	33697	50369	20901.6	3265868
	Image 9	Pole	0.512	91424.9	81505	110342	46809.6	7313995	6774100	640614		0.194135	0.164439
		Pole	0.512	77927.6	66095	86792	39898.9	6234205
		Background	0.512	76668.6	68374	87945	39254.3	6133486
	Image 10	Pole	0.512	42195.2	32328	56233	21604	3375620	3326261	0		0	0
		Pole	0.512	40961.3	31857	45345	20972.2	3276902
		Background	0.512	42733.3	35964	50069	21879.5	3418664
	Image 11	Pole	0.512	40540.6	31463	55931	20756.8	3243249	3178992	0		0	0
		Pole	0.512	38934.2	32908	43956	19934.3	3114735
		Background	0.512	41328.5	34934	48306	21160.2	3306281
	Image 12	Pole	0.512	22333	16339	30135	11434.5	1786642	2117215	65978		0.0199944	0.0169358
		Pole	0.512	30597.3	21657	37274	15665.8	2447788
		Background	0.512	25640.5	21018	31832	13127.9	2051237
	Image 13	Pole	0.512	27413.3	23429	36021	14035.6	2193066	2431846	233183		0.0706651	0.0598556
		Pole	0.512	33382.8	19827	45531	17092	2670626
		Background	0.512	27483.3	22429	32541	14071.4	2198663
	Image 14	Pole	0.512	51476.2	37864	79235	26355.8	4118093	3607114	512626		0.155349	0.131586
		Pole	0.512	38701.7	30871	47143	19815.3	3096135
		Background	0.512	38681.1	31952	48067	19804.7	3094488
	Image 15	Pole	0.512	29094.8	19578	42285	14896.6	2327587	2.54731e+06	327220		0.0991628	0.083994
		Pole	0.512	34587.8	25169	57731	17709	2767026
		Background	0.512	27751.1	20612	35412	14208.5	2220086
	Image 16	Pole	0.512	71430.1	58709	86114	36572.2	5714407	4.73858e+06	681756		0.206603	0.175
		Pole	0.512	47034.3	35374	61930	24081.6	3762746
		Background	0.512	50710.2	39236	56846	25963.6	4056820
	Image 17	Pole	0.512	47762.9	38985	60407	24454.6	3821032	4013119	643730		0.19508	0.165239
		Pole	0.512	52565.1	43651	61584	26913.3	4205206
		Background	0.512	42117.4	34626	52920	21564.1	3369389
	Image 18	Pole	0.512	49779.7	31284	82588	25487.2	3982374	3.84711e+06	1.00404e+06		0.30427	0.257726
		Pole	0.512	46398.1	26330	79945	23755.8	3711845
		Background	0.512	35538.4	25836	43924	18195.6	2843069
	Image 19	Pole	0.512	43890.3	31814	71383	22471.8	3511224	2981750	544979		0.165154	0.13989
		Pole	0.512	30653.5	22826	39563	15694.6	2452276
		Background	0.512	30459.6	25381	40077	15595.3	2436771
	Image 20	Pole	0.512	72968.1	60479	91782	37359.6	5837445	5271376	1069862		0.324217	0.274622
		Pole	0.512	58816.3	51811	66862	30114	4705307
		Background	0.512	52518.9	44304	61789	26889.7	4201514
LoKI-off	Image 1	Pole	0.512	119276	88673	142396	61069.4	9542096	12068441	0	1.04421e+06	0	0
500 nM		Pole	0.512	182435	149199	207412	93406.6	14594786
		Background	0.512	166850	147698	190891	85427.4	13348039
	Image 2	Pole	0.512	119189	95286	143516	61024.6	9535092	7826478	1895023		0.574279	0.486432
		Pole	0.512	76473.3	63977	98597	39154.3	6117864
		Background	0.512	74143.2	62711	85216	37961.3	5931455
	Image 3	Pole	0.512	214986	196266	240841	110073	17198857	1.5498e+07	3.15443e+06		0.955938	0.80971
		Pole	0.512	172464	144506	193188	88301.7	13797140
		Background	0.512	154295	131298	172903	78998.8	12343564
	Image 4	Pole	0.512	204475	179259	234225	104691	16357963	17314648	229686		0.0696054	0.0589579
		Pole	0.512	228392	196727	256082	116937	18271333
		Background	0.512	213562	195065	233649	109344	17084962
	Image 5	Pole	0.512	76588.4	59864	107130	39213.3	6127075	5.76681e+06	868880		0.263311	0.223032
		Pole	0.512	67581.9	47798	93668	34601.9	5406554
		Background	0.512	61224.2	53988	69344	31346.8	4897934
	Image 6	Pole	0.512	33949.2	24818	46239	17382	2715932	3376235	411267		0.124633	0.105568
		Pole	0.512	50456.7	40189	64763	25833.8	4036538
		Background	0.512	37062.1	31820	43182	18975.8	2964968
	Image 7	Pole	0.512	78468.5	45343	108932	40175.9	6277483	5779146	1140398		0.345593	0.292728
		Pole	0.512	66010.1	50124	96978	33797.2	5280809
		Background	0.512	57984.3	52624	66979	29688	4638748
	Image 8	Pole	0.512	50315.8	28396	76998	25761.7	4025262	4.2152e+06	952536		0.288662	0.244506
		Pole	0.512	55064.1	34751	77412	28192.8	4405129
		Background	0.512	40783.2	34711	44364	20881	3262660
	Image 9	Pole	0.512	60722	44851	88793	31089.7	4857761	4.37023e+06	830810		0.251774	0.21326
		Pole	0.512	48533.8	36116	62396	24849.3	3882708
		Background	0.512	44242.8	29508	56002	22652.3	3539424
	Image 10	Pole	0.512	62206.2	33371	108638	31849.5	4976492	4397389	1758828		0.533005	0.451472
		Pole	0.512	47728.6	32785	69154	24437	3818286
		Background	0.512	32982	26868	46528	16886.8	2638561
	Image 11	Pole	0.512	71447.7	51718	85100	36581.2	5715815	4821049	1264664		0.383251	0.324626
		Pole	0.512	49078.5	37583	57501	25128.2	3926283
		Background	0.512	44454.8	39799	49018	22760.9	3556385
	Image 12	Pole	0.512	53017.1	27971	101709	27144.8	4241371	3.8775e+06	1.86796e+06		0.566078	0.479486
		Pole	0.512	43920.3	26091	64781	22487.2	3513626
		Background	0.512	25119.2	18520	34775	12861	2009538
	Image 13	Pole	0.512	73349.7	29838	130591	37555.1	5867978	5.00459e+06	2.73286e+06		0.828183	0.701497
		Pole	0.512	51765.1	24471	94511	26503.7	4141207
		Background	0.512	28396.6	22760	36357	14539.1	2271730
	Image 14	Pole	0.512	35540.6	25176	48396	18196.8	2843245	3.12842e+06	730896		0.221495	0.187613
		Pole	0.512	42669.8	25010	84145	21847	3413586
		Background	0.512	29969	23834	45158	15344.1	2397520
	Image 15	Pole	0.512	43642.9	19669	87873	22345.2	3491435	3316036	1535459		0.465314	0.394136
		Pole	0.512	39258	21496	71009	20100.1	3140637
		Background	0.512	22257.2	15343	31268	11395.7	1780577
	Image 16	Pole	0.512	48504	28576	76021	24834.1	3880323	3.48305e+06	781380		0.236794	0.200572
		Pole	0.512	38572.3	26225	54768	19749	3085786
		Background	0.512	33770.9	24521	39839	17290.7	2701675
	Image 17	Pole	0.512	44441.6	35408	59381	22754.1	3555325	3.56585e+06	729162		0.22097	0.187168
		Pole	0.512	44704.7	28203	68779	22888.8	3576372
		Background	0.512	35458.6	29382	45646	18154.8	2836686
	Image 18	Pole	0.512	21488.5	16444	27911	11002.1	1719084	2.25605e+06	0		0	0
		Pole	0.512	34912.6	26759	43556	17875.3	2793009
		Background	0.512	33132.2	27170	39381	16963.7	2650578
	Image 19	Pole	0.512	39867.9	33645	53812	20412.3	3189429	3.12023e+06	0		0	0
		Pole	0.512	38137.8	24989	52113	19526.6	3051024
		Background	0.512	43486.7	32802	55450	22265.2	3478938
	Image 20	Pole	0.512	110834	91620	128545	56747	8866712	9.08473e+06	0		0	0
		Pole	0.512	116284	87291	151777	59537.6	9302749
		Background	0.512	119675	107017	130636	61273.4	9573976

## Sheet: pT210Plk1_ex2
			Area	Mean	Min	Max	IntDen	RawIntDen	Avg RawIntDen	ARID-Background	ARID-Background Avg Signal	by avg LoKI-on dmso	by avg LoKI-off dmso
LoKI-on	Image 1	Pole	0.512	122096	99546	146361	62513.2	9767684
250 nM		Pole	0.512	136038	113185	164276	69651.5	10883042	10325363	0	691226	0	0
		Background	0.512	141180	126414	156532	72284.1	11294386
	Image 2	Pole	0.512	162268	136396	199431	83081.4	12981469
		Pole	0.512	159502	132688	185002	81664.8	12760120	1.28708e+07	0		0	0
		Background	0.512	163796	140627	180792	83863.7	13103699
	Image 3	Pole	0.512	60187.6	44755	79894	30816	4815005
		Pole	0.512	53165.3	41119	70795	27220.6	4253222	4.53411e+06	415902		0.145886	0.0935863
		Background	0.512	51477.7	43851	61159	26356.6	4118212
	Image 4	Pole	0.512	108252	96378	125279	55425	8660158
		Pole	0.512	55261	38543	78303	28293.6	4420877	6.54052e+06	0		0	0
		Background	0.512	85374.8	68093	98580	43711.9	6829982
	Image 5	Pole	0.512	73061.2	56499	90390	37407.4	5844899
		Pole	0.512	113253	91555	139557	57985.7	9060260	7.45258e+06	41368.5		0.0145109	0.00930875
		Background	0.512	92640.1	76898	108873	47431.8	7411211
	Image 6	Pole	0.512	91894.5	75319	107932	47050	7351561
		Pole	0.512	62353.2	53346	72587	31924.8	4988253	6169907	1043846		0.366151	0.234887
		Background	0.512	64075.8	51092	72363	32806.8	5126061
	Image 7	Pole	0.512	115991	94928	136277	59387.2	9279253
		Pole	0.512	130298	93105	160273	66712.7	10423864	9.85156e+06	0		0	0
		Background	0.512	136237	127901	151245	69753.1	10898927
	Image 8	Pole	0.512	112478	96559	145137	57588.7	8998235
		Pole	0.512	124741	110267	135247	63867.4	9979283	9488759	603007		0.211518	0.135689
		Background	0.512	111072	96399	121221	56868.8	8885752
	Image 9	Pole	0.512	106234	89830	122753	54391.7	8498705
		Pole	0.512	100088	87072	119286	51245.2	8007057	8252881	133585		0.0468578	0.0300593
		Background	0.512	101491	90582	113838	51963.5	8119296
	Image 10	Pole	0.512	83227	61447	108470	42612.2	6658161
		Pole	0.512	69605.2	58933	83085	35637.8	5568413	6113287	1436120		0.50375	0.323156
		Background	0.512	58464.6	47619	69620	29933.9	4677167
	Image 11	Pole	0.512	56302.5	36276	73417	28826.9	4504199
		Pole	0.512	61200.3	42956	83832	31334.5	4896023	4700111	757546		0.265725	0.170463
		Background	0.512	49282.1	40007	59170	25232.4	3942565
	Image 12	Pole	0.512	150272	112516	189439	76939.4	12021787
		Pole	0.512	142679	129348	157721	73051.5	11414302	1.1718e+07	2.18417e+06		0.766144	0.491483
		Background	0.512	119173	107704	129044	61016.8	9533874
	Image 13	Pole	0.512	103095	84559	127408	52784.7	8247605
		Pole	0.512	110264	83262	130486	56455	8821091	8534348	756278		0.265281	0.170178
		Background	0.512	97225.9	80705	107811	49779.6	7778070
	Image 14	Pole	0.512	121040	102212	140969	61972.6	9683223
		Pole	0.512	119726	105302	131283	61299.9	9578111	9630667	102428		0.0359288	0.0230484
		Background	0.512	119103	107197	136938	60980.7	9528239
	Image 15	Pole	0.512	100020	77779	124106	51210.4	8001632
		Pole	0.512	89829.1	63175	128637	45992.5	7186325	7.59398e+06	2.24542e+06		0.787629	0.505265
		Background	0.512	66857	60858	79805	34230.8	5348558
	Image 16	Pole	0.512	115465	107449	124616	59118	9237180
		Pole	0.512	130693	110085	155430	66914.6	10455401	9.84629e+06	369824		0.129723	0.0832178
		Background	0.512	118456	107947	140645	60649.4	9476467
	Image 17	Pole	0.512	122439	103546	143862	62688.9	9795134
		Pole	0.512	114687	97028	130431	58719.9	9174985	9.48506e+06	487518		0.171007	0.109701
		Background	0.512	112469	97266	132096	57584.3	8997542
	Image 18	Pole	0.512	105194	83347	134540	53859.4	8415536
		Pole	0.512	101646	79436	129802	52043	8131717	8.27363e+06	1.45308e+06		0.509699	0.326972
		Background	0.512	85256.8	74707	100129	43651.5	6820547
	Image 19	Pole	0.512	153705	139403	175007	78697.1	12296414
		Pole	0.512	140545	122653	156524	71958.8	11243568	11769991	557112		0.195419	0.125362
		Background	0.512	140161	119247	160928	71762.4	11212879
	Image 20	Pole	0.512	95720.6	76906	110442	49009	7657652
		Pole	0.512	119163	85644	146080	61011.4	9533030	8595341	1237322		0.434017	0.278423
		Background	0.512	91975.2	79284	103990	47091.3	7358019
LoKI-on	Image 1	Pole	0.512	140948	92670	191761	72165.5	11275860
DMSO		Pole	0.512	103431	64553	147121	52956.4	8274445	9.77515e+06	3.73255e+06	2.85086e+06	1.30927	0.839899
		Background	0.512	75532.6	66819	91327	38672.7	6042605
	Image 2	Pole	0.512	178519	123630	256831	91401.6	14281494
		Pole	0.512	126721	83210	168072	64881.1	10137666	12209580	4000259		1.40318	0.90014
		Background	0.512	102617	84601	116893	52539.7	8209321
	Image 3	Pole	0.512	235041	183796	274259	120341	18803317
		Pole	0.512	203152	143926	259539	104014	16252142	1.75277e+07	3.51678e+06		1.23358	0.791346
		Background	0.512	175137	155073	188631	89670.1	14010952
	Image 4	Pole	0.512	144251	85010	219334	73856.3	11540052
		Pole	0.512	139929	99907	179325	71643.6	11194312	11367182	3870968		1.35782	0.871047
		Background	0.512	93702.7	75405	115476	47975.8	7496214
	Image 5	Pole	0.512	120843	61777	198531	61871.5	9667421
		Pole	0.512	88178.1	37494	131485	45147.2	7054245	8360833	3305281		1.1594	0.743755
		Background	0.512	63194.4	54188	72510	32355.5	5055552
	Image 6	Pole	0.512	177745	128857	248369	91005.4	14219587
		Pole	0.512	182610	148012	220111	93496.4	14608815	14414201	2839359		0.995966	0.638914
		Background	0.512	144686	126314	157978	74079	11574842
	Image 7	Pole	0.512	132428	86510	158981	67803.3	10594264
		Pole	0.512	146477	86601	179469	74996.3	11718165	1.11562e+07	1.67e+06		0.58579	0.375785
		Background	0.512	118578	100469	132199	60711.7	9486210
	Image 8	Pole	0.512	100102	72743	143862	51252	8008123
		Pole	0.512	94390.7	59067	135614	48328.1	7551258	7.77969e+06	2.69236e+06		0.944401	0.605835
		Background	0.512	63591.7	52531	69946	32558.9	5087335
	Image 9	Pole	0.512	78193.2	53709	102487	40034.9	6255456
		Pole	0.512	78066.4	49258	128538	39970	6245314	6250385	1733027		0.607896	0.389966
		Background	0.512	56467	45862	71202	28911.1	4517358
	Image 10	Pole	0.512	64706.6	39340	90577	33129.8	5176531
		Pole	0.512	71358.3	40884	99310	36535.5	5708665	5442598	2574097		0.902919	0.579224
		Background	0.512	35856.3	27003	45239	18358.4	2868501
	Image 11	Pole	0.512	110359	71824	148351	56504	8828750
		Pole	0.512	83635.6	57063	120749	42821.4	6690846	7759798	3307847		1.1603	0.744333
		Background	0.512	55649.4	47569	64790	28492.5	4451951
	Image 12	Pole	0.512	86869.7	62641	119203	44477.3	6949574
		Pole	0.512	69331.3	48073	90716	35497.6	5546504	6248039	2480442		0.870068	0.55815
		Background	0.512	47095	36216	58110	24112.6	3767597
	Image 13	Pole	0.512	85372.6	57769	132927	43710.8	6829805
		Pole	0.512	82417.3	45361	114149	42197.7	6593383	6711594	2236117		0.784366	0.503172
		Background	0.512	55943.5	43369	65036	28643.1	4475477
	Image 14	Pole	0.512	159705	103339	217873	81769.2	12776436
		Pole	0.512	135046	94446	171994	69143.7	10803697	1.17901e+07	2.91802e+06		1.02356	0.656614
		Background	0.512	110901	78611	135916	56781.1	8872044
	Image 15	Pole	0.512	125582	77507	164021	64297.8	10046529
		Pole	0.512	91530.1	61153	121492	46863.4	7322412	8.68447e+06	2.53494e+06		0.889184	0.570413
		Background	0.512	76869.1	60273	89813	39357	6149531
	Image 16	Pole	0.512	94128.2	57889	139866	48193.6	7530255
		Pole	0.512	129214	87350	192617	66157.6	10337119	8933687	3271671		1.14761	0.736193
		Background	0.512	70775.2	62845	82475	36236.9	5662016
	Image 17	Pole	0.512	165404	121289	204801	84686.8	13232307
		Pole	0.512	134809	96364	173275	69022.1	10784704	1.20085e+07	3.7717e+06		1.323	0.84871
		Background	0.512	102960	93717	110092	52715.5	8236804
	Image 18	Pole	0.512	85051.1	64076	119197	43546.1	6804085
		Pole	0.512	80126.8	54001	113460	41024.9	6410145	6607115	1599688		0.561125	0.359962
		Background	0.512	62592.8	49849	73733	32047.5	5007427
	Image 19	Pole	0.512	91015.3	66033	114818	46599.8	7281222
		Pole	0.512	134369	78462	174569	68796.8	10749506	9015364	2315967		0.812375	0.52114
		Background	0.512	83742.5	70380	99451	42876.1	6699397
	Image 20	Pole	0.512	150037	97290	194771	76818.7	12002921
		Pole	0.512	122733	98231	159000	62839.4	9818663	10910792	2646128		0.928186	0.595433
		Background	0.512	103308	88656	121263	52893.8	8264664
LoKI-off	Image 2	Pole	0.512	57543.2	45613	68360	29462.1	4603454
250 nM		Pole	0.512	66865.7	34244	104722	34235.2	5349254	4976354	1387084	2.7488e+06	0.486549	0.312122
		Background	0.512	44865.9	36538	51713	22971.3	3589270
	Image 3	Pole	0.512	79500.3	54652	113695	40704.2	6360024
		Pole	0.512	95091.1	73895	127405	48686.6	7607288	6983656	1784281		0.625875	0.4015
		Background	0.512	64992.2	57974	73629	33276	5199375
	Image 4	Pole	0.512	160696	116380	200734	82276.3	12855678
		Pole	0.512	151731	106864	214263	77686.3	12138488	12497083	3558593		1.24825	0.800756
		Background	0.512	111731	97776	136770	57206.3	8938490
	Image 5	Pole	0.512	79611.2	41622	109982	40761	6368900
		Pole	0.512	69252.3	36811	102447	35457.2	5540181	5.95454e+06	1.97132e+06		0.691483	0.443587
		Background	0.512	49790.2	44181	54979	25492.6	3983220
	Image 6	Pole	0.512	200311	135412	249486	102559	16024842
		Pole	0.512	174457	123831	206818	89322.1	13956571	1.49907e+07	5.39746e+06		1.89328	1.21454
		Background	0.512	119916	105794	141536	61396.8	9593244
	Image 7	Pole	0.512	96596.7	62850	122869	49457.5	7727739
		Pole	0.512	101194	58239	137583	51811.6	8095560	7.91165e+06	4.09095e+06		1.43499	0.920548
		Background	0.512	47758.7	44767	53270	24452.5	3820696
	Image 8	Pole	0.512	90773.4	61798	117655	46476	7261874
		Pole	0.512	80824.8	43865	120392	41382.3	6465982	6863928	3369515		1.18193	0.758209
		Background	0.512	43680.2	34800	50148	22364.2	3494413
	Image 9	Pole	0.512	175209	143430	207281	89706.8	14016693
		Pole	0.512	149128	123915	176959	76353.7	11930262	1.29735e+07	3.63604e+06		1.27542	0.818183
		Background	0.512	116718	106849	127361	59759.6	9337439
	Image 10	Pole	0.512	91642.9	63839	120329	46921.2	7331436
		Pole	0.512	122604	83608	168962	62773.3	9808336	8569886	2849796		0.999627	0.641262
		Background	0.512	71501.1	57084	85777	36608.6	5720090
	Image 11	Pole	0.512	56504.4	39047	82427	28930.3	4520354
		Pole	0.512	50409.5	23662	80783	25809.7	4032763	4.27656e+06	2.41877e+06		0.848437	0.544273
		Background	0.512	23222.3	17768	32689	11889.8	1857784
	Image 12	Pole	0.512	66562.9	37680	104034	34080.2	5325032
		Pole	0.512	65910.4	43103	93653	33746.1	5272829	5.29893e+06	2.54805e+06		0.893784	0.573364
		Background	0.512	34386	27430	46991	17605.6	2750877
	Image 13	Pole	0.512	148357	97278	205066	75958.9	11868582
		Pole	0.512	158922	116782	225819	81368.3	12713790	12291186	2991459		1.04932	0.673139
		Background	0.512	116247	104565	138699	59518.3	9299727
	Image 14	Pole	0.512	140512	108511	175388	71942.3	11240988
		Pole	0.512	100056	73923	132106	51228.5	8004456	9622722	2560979		0.898318	0.576272
		Background	0.512	88271.8	78534	97820	45195.2	7061743
	Image 15	Pole	0.512	101979	65743	133309	52213.3	8158322
		Pole	0.512	91411.9	49002	137085	46802.9	7312948	7735635	3542594		1.24264	0.797156
		Background	0.512	52413	43162	68830	26835.5	4193041
	Image 16	Pole	0.512	242602	198211	302636	124212	19408149
		Pole	0.512	245425	197855	297445	125657	19633978	1.95211e+07	4.1592e+06		1.45893	0.935904
		Background	0.512	192023	179005	203877	98315.9	15361866
	Image 17	Pole	0.512	74205.5	37876	98711	37993.2	5936443
		Pole	0.512	72618.5	54811	92730	37180.7	5809478	5.87296e+06	1.27366e+06		0.446762	0.286599
		Background	0.512	57491.3	49892	64231	29435.5	4599304
	Image 18	Pole	0.512	41666.5	24276	64904	21333.2	3333317
		Pole	0.512	37911.8	21389	58891	19410.8	3032942	3.18313e+06	1.01757e+06		0.356936	0.228975
		Background	0.512	27069.5	22286	33022	13859.6	2165556
	Image 19	Pole	0.512	81869.9	68851	98508	41917.4	6549594
		Pole	0.512	62560.2	47825	79627	32030.8	5004813	5.7772e+06	1.79736e+06		0.630461	0.404442
		Background	0.512	49748.1	42017	56232	25471	3979848
	Image 20	Pole	0.512	130641	87655	167731	66888.1	10451268
		Pole	0.512	161940	128305	213278	82913.4	12955215	1.17032e+07	1.87254e+06		0.656834	0.42136
		Background	0.512	122884	112639	135186	62916.5	9830699
LoKI-off	Image 1	Pole	0.512	89580	46137	143171	45865	7166400
DMSO		Pole	0.512	149016	101009	193690	76296.1	11921259	9.54383e+06	1.81994e+06	4.44404e+06	0.638382	0.409523
		Background	0.512	96548.6	82458	108775	49432.9	7723891
	Image 2	Pole	0.512	178127	91381	249157	91201.1	14250175
		Pole	0.512	139588	70743	188294	71469.2	11167061	12708618	6698396		2.34961	1.50728
		Background	0.512	75127.8	62070	92662	38465.4	6010222
	Image 3	Pole	0.512	173671	108832	238090	88919.7	13893696
		Pole	0.512	189475	107438	280403	97011.1	15157991	1.45258e+07	5.79263e+06		2.03189	1.30346
		Background	0.512	109165	86925	124937	55892.6	8733216
	Image 4	Pole	0.512	168738	114964	231318	86393.7	13499010
		Pole	0.512	123219	85045	145812	63088.3	9857545	1.16783e+07	2.72426e+06		0.955591	0.613013
		Background	0.512	111925	90825	134023	57305.7	8954022
	Image 5	Pole	0.512	144750	84640	203366	74112	11579993
		Pole	0.512	162368	111626	208707	83132.4	12989441	12284717	3375024		1.18386	0.759449
		Background	0.512	111371	102182	127359	57022	8909693
	Image 6	Pole	0.512	274423	222938	334983	140505	21953837
		Pole	0.512	238150	170441	295593	121933	19052024	2.05029e+07	3.88062e+06		1.36121	0.873219
		Background	0.512	207779	185455	230984	106383	16622307
	Image 7	Pole	0.512	248619	167357	310478	127293	19889523
		Pole	0.512	207236	153241	258917	106105	16578845	18234184	6629704		2.32551	1.49182
		Background	0.512	145056	133894	168460	74268.7	11604480
	Image 8	Pole	0.512	132515	85777	196132	67847.6	10601185
		Pole	0.512	92632.3	65839	109819	47427.8	7410587	9005886	2652466		0.930409	0.596859
		Background	0.512	79417.8	62387	97315	40661.9	6353420
	Image 9	Pole	0.512	265052	219649	319240	135707	21204157
		Pole	0.512	234871	175288	278000	120254	18789683	19996920	4448441		1.56039	1.00099
		Background	0.512	194356	180249	204867	99510.3	15548479
	Image 10	Pole	0.512	118921	62176	156832	60887.7	9513696
		Pole	0.512	88194.1	50353	144581	45155.4	7055527	8.28461e+06	5.15171e+06		1.80707	1.15924
		Background	0.512	39161.3	30357	60103	20050.6	3132904
	Image 11	Pole	0.512	123886	70892	171895	63429.9	9910915
		Pole	0.512	99850	67338	124327	51123.2	7987997	8949456	4951149		1.73672	1.11411
		Background	0.512	49978.8	38621	55111	25589.2	3998307
	Image 12	Pole	0.512	125067	86629	146523	64034.4	10005372
		Pole	0.512	127620	82335	161201	65341.5	10209612	10107492	3698242		1.29724	0.83218
		Background	0.512	80115.6	74927	88997	41019.2	6409250
	Image 13	Pole	0.512	118500	61562	187404	60672.2	9480027
		Pole	0.512	120227	65716	189685	61556.4	9618192	9.54911e+06	4.04612e+06		1.41926	0.91046
		Background	0.512	68787.3	59060	80174	35219.1	5502987
	Image 14	Pole	0.512	215041	120469	291384	110101	17203262
		Pole	0.512	196321	140876	251464	100516	15705667	1.64545e+07	7.97168e+06		2.79624	1.79379
		Background	0.512	106035	81383	119004	54289.8	8482781
	Image 15	Pole	0.512	127420	78798	173272	65238.8	10193566
		Pole	0.512	94602.2	66064	127648	48436.3	7568179	8.88087e+06	3.58568e+06		1.25775	0.806851
		Background	0.512	66189.9	55727	79707	33889.2	5295191
	Image 16	Pole	0.512	109629	65767	158109	56130	8770319
		Pole	0.512	77810.9	52509	94181	39839.2	6224874	7.4976e+06	3.54512e+06		1.24353	0.797723
		Background	0.512	49406	38964	61331	25295.9	3952480
	Image 17	Pole	0.512	99390.3	53480	139667	50887.8	7951222
		Pole	0.512	96900.5	46257	162629	49613.1	7752043	7.85163e+06	3.94144e+06		1.38254	0.886904
		Background	0.512	48877.4	37982	55521	25025.2	3910194
	Image 18	Pole	0.512	173445	111477	222783	88803.7	13875585
		Pole	0.512	135232	83318	189977	69238.8	10818556	1.23471e+07	2.93375e+06		1.02908	0.660154
		Background	0.512	117666	106746	129004	60245.2	9413318
	Image 19	Pole	0.512	130757	80813	177763	66947.6	10460568
		Pole	0.512	147679	72197	238678	75611.9	11814354	11137461	5659931		1.98534	1.2736
		Background	0.512	68469.1	58572	80354	35056.2	5477530
	Image 20	Pole	0.512	159000	97198	216714	81408.2	12720038
		Pole	0.512	156602	82620	239460	80180.3	12528170	12624104	5374556		1.88524	1.20938
		Background	0.512	90619.4	80459	104365	46397.1	7249548
LoKI-on	Image 2	Pole	0.512	180943	145892	214113	92642.9	14475459
		Pole	0.512	102104	68382	140681	52277.3	8168330	1.13219e+07	0	1.54991e+06	0	0
		Background	0.512	151802	131163	168891	77722.8	12144182
	Image 3	Pole	0.512	113724	75805	140977	58226.4	9097881
		Pole	0.512	111614	73243	143348	57146.4	8929118	9.0135e+06	3.01134e+06		1.05629	0.677612
		Background	0.512	75027	68656	80754	38413.8	6002161
	Image 4	Pole	0.512	57151.1	35623	84286	29261.3	4572084
		Pole	0.512	66046.7	45687	98568	33815.9	5283739	4.92791e+06	1.22403e+06		0.429355	0.275432
		Background	0.512	46298.5	37524	53635	23704.8	3703880
	Image 5	Pole	0.512	87678.8	70823	103819	44891.6	7014307
		Pole	0.512	75212.2	46087	108621	38508.6	6016973	6515640	2742204		0.961887	0.617052
		Background	0.512	47167.9	39523	53263	24150	3773436
	Image 6	Pole	0.512	67178.8	47768	98035	34395.5	5374300
		Pole	0.512	78820.4	58092	115638	40356.1	6305633	5.83997e+06	1.3122e+06		0.460282	0.295272
		Background	0.512	56597.1	45733	67607	28977.7	4527766
	Image 7	Pole	0.512	85671.3	61086	100478	43863.7	6853706
		Pole	0.512	99827.8	71621	134456	51111.9	7986227	7.41997e+06	975284		0.342102	0.219459
		Background	0.512	80558.5	65726	99378	41246	6444683
	Image 8	Pole	0.512	77587.4	63592	98983	39724.7	6206992
		Pole	0.512	76050.1	44197	117631	38937.7	6084009	6.1455e+06	1.98797e+06		0.697323	0.447334
		Background	0.512	51969.1	44136	58043	26608.2	4157529
	Image 9	Pole	0.512	105146	82733	128029	53834.9	8411698
		Pole	0.512	110676	84292	133063	56666	8854062	8632880	724565		0.254157	0.163042
		Background	0.512	98853.9	84641	111736	50613.2	7908315
	Image 10	Pole	0.512	76236	62547	93455	39032.8	6098879
		Pole	0.512	65607.3	50087	85088	33590.9	5248585	5673732	228314		0.080086	0.0513753
		Background	0.512	68067.7	58179	78125	34850.7	5445418
	Image 11	Pole	0.512	123846	96034	145410	63408.9	9907642
		Pole	0.512	126956	84512	163546	65001.7	10156510	10032076	4211366		1.47723	0.947643
		Background	0.512	72758.9	59797	82069	37252.5	5820710
	Image 12	Pole	0.512	179441	153127	205096	91873.8	14355281
		Pole	0.512	189360	143476	236220	96952.4	15148818	1.4752e+07	2.26567e+06		0.794732	0.509821
		Background	0.512	156080	127725	188413	79912.8	12486381
	Image 13	Pole	0.512	98244.4	71000	127106	50301.1	7859554
		Pole	0.512	97404.2	73548	127700	49871	7792339	7.82595e+06	1.81143e+06		0.635397	0.407608
		Background	0.512	75181.5	61482	85864	38492.9	6014520
	Image 14	Pole	0.512	64899.7	48427	94705	33228.7	5191978
		Pole	0.512	77248.2	49131	103093	39551.1	6179859	5.68592e+06	916362		0.321434	0.2062
		Background	0.512	59619.4	45495	67889	30525.2	4769556
	Image 15	Pole	0.512	152623	115880	182663	78143	12209847
		Pole	0.512	172093	138939	200382	88111.8	13767465	12988656	2957092		1.03726	0.665406
		Background	0.512	125395	113652	137055	64202	10031564
	Image 16	Pole	0.512	116119	90223	146035	59453	9289538
		Pole	0.512	82763.8	69337	96031	42375.1	6621104	7955321	1029555		0.361138	0.231671
		Background	0.512	86572.1	76185	94706	44324.9	6925766
	Image 17	Pole	0.512	99815	77906	126369	51105.3	7985203
		Pole	0.512	80602.2	46942	109077	41268.3	6448176	7.21669e+06	1.00193e+06		0.351447	0.225454
		Background	0.512	77684.5	70071	85205	39774.5	6214762
	Image 18	Pole	0.512	90097.7	63676	120009	46130	7207816
		Pole	0.512	58975.5	45732	80757	30195.5	4718040	5962928	511970		0.179584	0.115204
		Background	0.512	68137	57368	79360	34886.1	5450958
	Image 19	Pole	0.512	93633.9	66837	130232	47940.6	7490714
		Pole	0.512	98207.5	68415	130876	50282.2	7856600	7673657	1772510		0.621746	0.398851
		Background	0.512	73764.3	63961	85037	37767.3	5901147
	Image 20	Pole	0.512	78522.5	61827	108919	40203.5	6281797
		Pole	0.512	90060.7	70147	113002	46111.1	7204859	6743328	764502		0.268165	0.172028
		Background	0.512	74735.3	69058	86013	38264.5	5978826
LoKI-off	Image 1	Pole	0.512	119091	70950	162567	60974.5	9527263
100 nM		Pole	0.512	155217	104948	217542	79471.2	12417376	1.09723e+07	2.04981e+06	2.3223e+06	0.719016	0.46125
		Background	0.512	111531	91973	128297	57104	8922506
	Image 2	Pole	0.512	110117	88972	138652	56380.1	8809385
		Pole	0.512	109146	81160	141699	55882.6	8731654	8.77052e+06	1.11121e+06		0.38978	0.250044
		Background	0.512	95741.4	81870	101932	49019.6	7659312
	Image 3	Pole	0.512	56421.8	29951	82614	28887.9	4513740
		Pole	0.512	60063.1	34158	96683	30752.3	4805048	4659394	736905		0.258485	0.165819
		Background	0.512	49031.1	42086	57398	25103.9	3922489
	Image 4	Pole	0.512	134147	109520	163598	68683.2	10731750
		Pole	0.512	50158.3	41560	58702	25681	4012664	7372207	2685714		0.942072	0.60434
		Background	0.512	58581.2	48713	67468	29993.6	4686493
	Image 5	Pole	0.512	56840.3	32976	87769	29102.2	4547226
		Pole	0.512	93385.7	41643	148960	47813.5	7470855	6.00904e+06	3.05212e+06		1.0706	0.686788
		Background	0.512	36961.6	29568	53407	18924.3	2956924
	Image 6	Pole	0.512	69160.2	37973	103436	35410	5532815
		Pole	0.512	88753.7	53586	139658	45441.9	7100299	6316557	2576621		0.903805	0.579792
		Background	0.512	46749.2	26275	65485	23935.6	3739936
	Image 7	Pole	0.512	134887	87666	178964	69062.3	10790986
		Pole	0.512	124861	95081	154662	63929	9988900	10389943	3755055		1.31717	0.844964
		Background	0.512	82936.1	75590	94027	42463.3	6634888
	Image 8	Pole	0.512	82252.2	46560	124607	42113.1	6580173
		Pole	0.512	96156.2	70786	120863	49232	7692500	7.13634e+06	2.26566e+06		0.79473	0.509821
		Background	0.512	60883.4	51073	71388	31172.3	4870672
	Image 9	Pole	0.512	189686	142196	220881	97119.5	15174916
		Pole	0.512	156373	125960	187058	80062.8	12509806	13842361	2522813		0.884931	0.567684
		Background	0.512	141494	131579	155691	72445.1	11319548
	Image 10	Pole	0.512	238671	191600	287202	122200	19093674
		Pole	0.512	236435	185575	285394	121055	18914774	19004224	985268		0.345604	0.221705
		Background	0.512	225237	207873	240832	115321	18018956
	Image 11	Pole	0.512	145577	102615	187180	74535.2	11646121
		Pole	0.512	156060	109035	197389	79902.6	12484789	12065455	3301214		1.15797	0.74284
		Background	0.512	109553	93865	120320	56091.1	8764241
	Image 12	Pole	0.512	146894	123722	181415	75209.7	11751509
		Pole	0.512	107110	86302	132119	54840.5	8568833	10160171	902387		0.316532	0.203055
		Background	0.512	115722	98671	133478	59249.8	9257784
	Image 13	Pole	0.512	163650	128608	204803	83788.6	13091973
		Pole	0.512	169027	132497	198316	86541.7	13522141	13307057	1411284		0.495038	0.317568
		Background	0.512	148697	138225	159201	76132.9	11895773
	Image 14	Pole	0.512	149247	102027	194627	76414.2	11939721
		Pole	0.512	120450	77269	167559	61670.3	9635984	1.07879e+07	2.47289e+06		0.867418	0.55645
		Background	0.512	103937	91554	122207	53215.8	8314966
	Image 15	Pole	0.512	265061	187028	349245	135711	21204872
		Pole	0.512	109994	62366	156226	56317.1	8799553	1.50022e+07	1.28015e+06		0.449041	0.288061
		Background	0.512	171526	154217	189401	87821.2	13722059
	Image 16	Pole	0.512	115329	70847	160503	59048.5	9226324
		Pole	0.512	144465	104751	175875	73966	11557183	1.03918e+07	715472		0.250967	0.160996
		Background	0.512	120954	109534	132265	61928.2	9676282
	Image 17	Pole	0.512	198112	163696	243654	101433	15848928
		Pole	0.512	165359	123558	215431	84663.6	13228695	1.45388e+07	5.59178e+06		1.96144	1.25826
		Background	0.512	111838	93797	129923	57261	8947033
	Image 18	Pole	0.512	137399	78835	187915	70348.4	10991930
		Pole	0.512	144866	89100	207578	74171.5	11589298	11290614	3421050		1.20001	0.769806
		Background	0.512	98369.6	84860	114178	50365.2	7869564
	Image 19	Pole	0.512	84294.5	45187	127207	43158.8	6743559
		Pole	0.512	102828	52885	154941	52647.7	8226206	7.48488e+06	3.28633e+06		1.15275	0.739491
		Background	0.512	52481.9	39015	66992	26870.8	4198555
LoKI-on	Image 1	Pole	0.512	132420	117748	146496	67799.1	10593605
500 nM		Pole	0.512	128378	112286	142101	65729.6	10270247	10431926	1129595	846124	0.39623	0.254182
		Background	0.512	116279	98732	127451	59534.9	9302331
	Image 2	Pole	0.512	147022	122337	175812	75275.3	11761762
		Pole	0.512	142429	112888	162517	72923.4	11394286	11578024	1881021		0.659808	0.423268
		Background	0.512	121213	109207	134062	62060.8	9697003
	Image 3	Pole	0.512	116000	97359	134596	59391.9	9279982
		Pole	0.512	114211	95505	127585	58476	9136874	9208428	1464929		0.513855	0.329639
		Background	0.512	96793.7	88502	109710	49558.4	7743499
	Image 4	Pole	0.512	226637	200639	254723	116038	18130971
		Pole	0.512	201618	183726	217932	103228	16129433	17130202	1143671		0.401167	0.257349
		Background	0.512	199832	184433	215504	102314	15986531
	Image 5	Pole	0.512	137710	122191	151045	70507.5	11016804
		Pole	0.512	165325	133259	188771	84646.4	13225994	12121399	0		0	0
		Background	0.512	158000	150364	169936	80896	12640006
	Image 6	Pole	0.512	190631	156012	226759	97603.1	15250478
		Pole	0.512	201268	164656	233420	103049	16101459	1.5676e+07	232372		0.0815096	0.0522885
		Background	0.512	193045	168129	212100	98839	15443596
	Image 7	Pole	0.512	275044	231298	319394	140822	22003507
		Pole	0.512	206112	166111	241775	105529	16488967	19246237	1534880		0.538392	0.345379
		Background	0.512	221392	204352	246657	113353	17711357
	Image 8	Pole	0.512	271044	243095	289249	138774	21683481
		Pole	0.512	274002	221199	304963	140289	21920190	2.18018e+07	0		0	0
		Background	0.512	303493	262500	327314	155388	24279447
	Image 9	Pole	0.512	316287	280325	350230	161939	25302965
		Pole	0.512	284518	262000	306869	145673	22761473	24032219	471641		0.165438	0.106129
		Background	0.512	294507	263338	323363	150788	23560578
	Image 10	Pole	0.512	49311.6	35184	56579	25247.5	3944924
		Pole	0.512	62342.7	53180	75646	31919.5	4987417	4.46617e+06	0		0	0
		Background	0.512	56598.8	49463	64535	28978.6	4527907
	Image 11	Pole	0.512	145698	134622	158829	74597.4	11655836
		Pole	0.512	165480	137780	198121	84725.8	13238409	1.24471e+07	2.01627e+06		0.707249	0.453701
		Background	0.512	130386	117446	141670	66757.5	10430855
	Image 12	Pole	0.512	333840	289708	358361	170926	26707226
		Pole	0.512	341188	292076	389948	174688	27295039	2.70011e+07	494148		0.173333	0.111193
		Background	0.512	331337	305377	358664	169645	26506984
	Image 13	Pole	0.512	142712	111661	164852	73068.4	11416941
		Pole	0.512	106224	70659	135482	54386.6	8497913	9957427	203135		0.0712539	0.0457095
		Background	0.512	121929	102008	138655	62427.5	9754292
	Image 14	Pole	0.512	201789	179337	242336	103316	16143116
		Pole	0.512	178918	154010	202009	91606.3	14313480	15228298	938497		0.329198	0.211181
		Background	0.512	178623	155325	199232	91454.7	14289801
	Image 15	Pole	0.512	142289	125364	158283	72851.8	11383097
		Pole	0.512	158367	133129	191669	81083.8	12669347	12026222	541350		0.18989	0.121815
		Background	0.512	143561	112544	165990	73503.2	11484872
	Image 16	Pole	0.512	116522	99256	130498	59659.3	9321768
		Pole	0.512	127701	110722	153950	65383.1	10216105	9.76894e+06	208300		0.0730655	0.0468716
		Background	0.512	119508	105509	138339	61188.1	9560637
	Image 17	Pole	0.512	161059	146574	177704	82462.2	12884713
		Pole	0.512	116018	105980	128065	59401	9281413	11083063	0		0	0
		Background	0.512	153501	130773	169787	78592.4	12280065
	Image 18	Pole	0.512	140498	123110	164228	71935.1	11239852
		Pole	0.512	138773	110181	166033	71051.8	11101836	11170844	1998496		0.701015	0.449702
		Background	0.512	114654	97688	135879	58703	9172348
	Image 19	Pole	0.512	95866.9	79696	106275	49083.8	7669350
		Pole	0.512	104431	94684	114803	53468.6	8354470	8011910	0		0	0
		Background	0.512	103053	94350	110505	52763.1	8244240
	Image 20	Pole	0.512	167920	153676	183308	85975.2	13433625
		Pole	0.512	142537	123601	158961	72978.9	11402952	1.24183e+07	2.66418e+06		0.934517	0.599494
		Background	0.512	121926	108755	136143	62426.3	9754111
LoKI-off	Image 1	Pole	0.512	130960	112005	153641	67051.7	10476828
500 nM		Pole	0.512	95869.6	83370	108687	49085.2	7669569	9.0732e+06	243218	970689	0.0853141	0.0547291
		Background	0.512	110375	95263	125184	56511.9	8829980
	Image 2	Pole	0.512	160236	126407	188168	82040.8	12818873
		Pole	0.512	162842	119022	199352	83375.1	13027358	1.29231e+07	2.77637e+06		0.973871	0.62474
		Background	0.512	126834	107009	149292	64939.2	10146745
	Image 3	Pole	0.512	172413	124060	214315	88275.7	13793076
		Pole	0.512	140401	111955	165332	71885.2	11232065	1.25126e+07	1.60096e+06		0.561572	0.360249
		Background	0.512	136395	118117	143268	69834.3	10911608
	Image 4	Pole	0.512	109370	95831	129698	55997.7	8749640
		Pole	0.512	108551	87554	126371	55578	8684056	8716848	38988		0.0136759	0.00877309
		Background	0.512	108473	93857	124603	55538.3	8677860
	Image 5	Pole	0.512	61469.1	43397	78100	31472.2	4917525
		Pole	0.512	54485.1	33372	69302	27896.4	4358811	4638168	125769		0.0441162	0.0283006
		Background	0.512	56405	41128	71450	28879.4	4512399
	Image 6	Pole	0.512	147203	123668	189755	75367.9	11776234
		Pole	0.512	128604	91728	184691	65845.2	10288319	1.10323e+07	348162		0.122125	0.0783434
		Background	0.512	133551	123035	151321	68378.3	10684115
	Image 7	Pole	0.512	160041	124146	209606	81940.9	12803263
		Pole	0.512	140849	95913	178944	72114.6	11267900	1.20356e+07	3.05093e+06		1.07018	0.686522
		Background	0.512	112308	104746	134179	57501.7	8984647
	Image 8	Pole	0.512	197820	172968	216587	101284	15825579
		Pole	0.512	162127	133203	197463	83008.8	12970123	14397851	1591609		0.558291	0.358144
		Background	0.512	160078	145827	175552	81959.9	12806242
	Image 9	Pole	0.512	109462	83300	141514	56044.5	8756952
		Pole	0.512	96422.1	65257	146450	49368.1	7713771	8.23536e+06	885366		0.310561	0.199225
		Background	0.512	91874.9	84363	107240	47040	7349996
	Image 10	Pole	0.512	179759	151704	201041	92036.5	14380705
		Pole	0.512	169312	142497	218545	86687.9	13544979	13962842	0		0	0
		Background	0.512	175954	155516	191654	90088.5	14076335
	Image 11	Pole	0.512	188319	126667	225958	96419.1	15065482
		Pole	0.512	183534	146525	219381	93969.3	14682702	14874092	818392		0.287068	0.184155
		Background	0.512	175696	161508	191301	89956.5	14055700
	Image 12	Pole	0.512	61914.8	43322	88263	31700.4	4953187
		Pole	0.512	69313	56439	90368	35488.2	5545039	5249113	0		0	0
		Background	0.512	69410.4	58427	83427	35538.1	5552830
	Image 13	Pole	0.512	96375.5	64303	146474	49344.2	7710037
		Pole	0.512	113273	85451	158786	57995.7	9061822	8.38593e+06	419562		0.14717	0.0944099
		Background	0.512	99579.6	84243	115911	50984.8	7966368
	Image 14	Pole	0.512	107963	89672	127681	55277	8637034
		Pole	0.512	80742.2	54866	102503	41340	6459374	7548204	1107169		0.388363	0.249136
		Background	0.512	80512.9	59832	91229	41222.6	6441035
	Image 15	Pole	0.512	86534.3	52713	106848	44305.6	6922744
		Pole	0.512	90919.5	74040	117028	46550.8	7273557	7.09815e+06	742604		0.260484	0.167101
		Background	0.512	79444.3	68379	89910	40675.5	6355547
	Image 16	Pole	0.512	99004.1	74017	118556	50690.1	7920329
		Pole	0.512	95767.4	63541	128964	49032.9	7661391	7790860	1495330		0.524519	0.33648
		Background	0.512	78694.1	69225	88393	40291.4	6295530
	Image 17	Pole	0.512	76435.5	45131	106452	39135	6114842
		Pole	0.512	71572.3	50826	96233	36645	5725783	5.92031e+06	1.39093e+06		0.487899	0.312988
		Background	0.512	56617.3	45790	68076	28988	4529382
	Image 18	Pole	0.512	92878.9	62512	114542	47554	7430314
		Pole	0.512	96197.7	65737	126913	49253.2	7695815	7.56306e+06	1.00627e+06		0.352972	0.226432
		Background	0.512	81959.9	67631	91690	41963.5	6556792
	Image 19	Pole	0.512	101703	70520	146463	52071.7	8136203
		Pole	0.512	73910.9	51541	102041	37842.4	5912876	7.02454e+06	801458		0.281129	0.180344
		Background	0.512	77788.5	64551	92736	39827.7	6223081
	Image 20	Pole	0.512	69638.6	47609	90945	35655	5571091

## Sheet: pT210Plk1_ex3
			Area	Mean	Min	Max	IntDen	RawIntDen	Avg RawIntDen	ARID-Background	ARID-Background Avg Signal	by avg LoKI-on dmso	by avg LoKI-off dmso
LoKI-on	Image 1	Pole	0.512	6152.98	4286	9112	3150.32	492238
250 nM		Pole	0.512	5479.01	3950	7166	2805.25	438321	465280	82587.5	1.07671e+06	0.0146784	0.0081673
		Background	0.512	4783.65	3282	8777	2449.23	382692
	Image 3	Pole	0.512	59691.6	34939	81367	30562.1	4775327
		Pole	0.512	46594.9	22698	72572	23856.6	3727591	4251459	704670		0.125242	0.0696867
		Background	0.512	44334.9	30051	72186	22699.5	3546789
	Image 4	Pole	0.512	77122.2	35951	115181	39486.6	6169775
		Pole	0.512	84199.9	55225	109088	43110.3	6735991	6452883	946193		0.168169	0.0935716
		Background	0.512	68833.6	46024	94283	35242.8	5506690
	Image 5	Pole	0.512	127176	91622	163036	65114.2	10174087
		Pole	0.512	101966	70428	157417	52206.6	8157283	9165685	2031385		0.361042	0.200889
		Background	0.512	89178.8	67312	111301	45659.5	7134300
	Image 6	Pole	0.512	63066.1	35406	95755	32289.8	5045285
		Pole	0.512	81247.3	49642	120889	41598.6	6499782	5.77253e+06	0		0	0
		Background	0.512	78374	64066	99488	40127.5	6269917
	Image 7	Pole	0.512	55669.3	27891	99721	28502.7	4453541
		Pole	0.512	82042.9	45455	131120	42006	6563434	5.50849e+06	2.68404e+06		0.477039	0.265432
		Background	0.512	35305.6	24775	52856	18076.5	2824448
	Image 8	Pole	0.512	78347.6	41074	117160	40114	6267810
		Pole	0.512	76123.6	34266	147588	38975.3	6089889	6.17885e+06	1.30522e+06		0.231979	0.129077
		Background	0.512	60920.3	32874	89912	31191.2	4873628
	Image 9	Pole	0.512	70027.1	32426	142188	35853.9	5602171
		Pole	0.512	46187.4	17610	87002	23647.9	3694990	4.64858e+06	1.41724e+06		0.251889	0.140155
		Background	0.512	40391.8	22225	67494	20680.6	3231340
	Image 10	Pole	0.512	34811.7	29583	42621	17823.6	2784932
		Pole	0.512	36161.6	24705	57901	18514.8	2892930	2838931	519039		0.0922498	0.0513292
		Background	0.512	28998.7	22593	38956	14847.3	2319892
LoKI-on	Image 1	Pole	0.512	111505	36323	259336	57090.6	8920402
DMSO		Pole	0.512	150563	81595	255170	77088.1	12045022	10482712	5972494	5.62645e+06	1.0615	0.590636
		Background	0.512	56377.7	40725	91523	28865.4	4510218
	Image 2	Pole	0.512	163703	86523	251937	83815.8	13096221
		Pole	0.512	159601	80990	238438	81715.5	12768046	1.29321e+07	5.33094e+06		0.947479	0.527192
		Background	0.512	95014.9	71331	121699	48647.6	7601189
	Image 3	Pole	0.512	206193	107326	322866	105571	16495444
		Pole	0.512	141773	50759	197778	72587.8	11341836	13918640	6602883		1.17354	0.652977
		Background	0.512	91447	67627	124259	46820.8	7315757
	Image 4	Pole	0.512	205294	116297	309724	105110	16423497
		Pole	0.512	136901	71510	235772	70093.3	10952084	1.36878e+07	6.33714e+06		1.12631	0.626697
		Background	0.512	91883.2	54094	139994	47044.2	7350655
	Image 5	Pole	0.512	192276	130454	262699	98445.3	15382072
		Pole	0.512	195510	102079	306107	100101	15640816	15511444	7883895		1.40122	0.77966
		Background	0.512	95344.4	75794	138356	48816.3	7627549
	Image 6	Pole	0.512	151351	61146	230014	77491.8	12108096
		Pole	0.512	117110	47137	193949	59960.2	9368785	1.07384e+07	4.67129e+06		0.830238	0.461957
		Background	0.512	75839.3	55567	96965	38829.7	6067146
	Image 7	Pole	0.512	160135	86099	243050	81989.1	12810799
		Pole	0.512	143953	53509	222001	73703.8	11516220	1.21635e+07	6.76593e+06		1.20252	0.669101
		Background	0.512	67469.8	34480	128130	34544.5	5397582
	Image 8	Pole	0.512	184330	101351	342712	94377.2	14746436
		Pole	0.512	177285	77204	284867	90769.8	14182777	1.44646e+07	8.5502e+06		1.51964	0.845553
		Background	0.512	73930	52364	93021	37852.2	5914402
	Image 9	Pole	0.512	107681	55301	192196	55132.6	8614463
		Pole	0.512	123545	47909	213005	63255	9883601	9249032	3676922		0.653506	0.363621
		Background	0.512	69651.4	46986	99821	35661.5	5572110
	Image 10	Pole	0.512	66655.5	44798	91362	34127.6	5332437
		Pole	0.512	64342.2	39313	103301	32943.2	5147380	5.23991e+06	2.31799e+06		0.41198	0.229232
		Background	0.512	36524	28826	48542	18700.3	2921921
	Image 11	Pole	0.512	80942.9	30810	157784	41442.7	6475428
		Pole	0.512	120820	50652	216153	61859.9	9665606	8070517	3125479		0.555497	0.309087
		Background	0.512	61813	49087	90811	31648.2	4945038
	Image 12	Pole	0.512	158193	71466	254912	80994.6	12655411
		Pole	0.512	175550	101210	259859	89881.8	14044035	13349723	10867478		1.9315	1.07471
		Background	0.512	31028.1	19743	51275	15886.4	2482245
	Image 13	Pole	0.512	119714	35488	229869	61293.7	9577146
		Pole	0.512	183351	90847	312152	93875.7	14668071	1.21226e+07	3.87204e+06		0.688185	0.382916
		Background	0.512	103132	71470	143471	52803.6	8250570
	Image 14	Pole	0.512	198032	120360	337866	101392	15842527
		Pole	0.512	132106	65253	179206	67638.1	10568452	1.32055e+07	5.08133e+06		0.903115	0.502507
		Background	0.512	101552	76137	131164	51994.6	8124158
	Image 15	Pole	0.512	117318	74611	202472	60067	9385473
		Pole	0.512	106931	54387	179458	54748.5	8554452	8.96996e+06	5.32329e+06		0.946119	0.526435
		Background	0.512	45583.4	34367	71504	23338.7	3646669
	Image 16	Pole	0.512	142991	74022	251626	73211.4	11439285
		Pole	0.512	109251	61007	181288	55936.7	8740102	1.00897e+07	4.66136e+06		0.828473	0.460975
		Background	0.512	67854.1	52001	92760	34741.3	5428332
	Image 17	Pole	0.512	166491	86423	279374	85243.3	13319262
		Pole	0.512	248937	139742	387193	127456	19914949	1.66171e+07	6.32304e+06		1.12381	0.625303
		Background	0.512	128676	90027	186578	65882	10294064
	Image 18	Pole	0.512	189741	110806	349045	97147.6	15179305
		Pole	0.512	193974	123007	299041	99314.6	15517906	1.53486e+07	7.81306e+06		1.38863	0.772655
		Background	0.512	94194.4	73097	114934	48227.5	7535549
	Image 19	Pole	0.512	121746	71137	199087	62334.2	9739715
		Pole	0.512	114728	82465	152487	58740.7	9178239	9458977	2477559		0.440341	0.245013
		Background	0.512	87267.7	64980	107400	44681.1	6981418
	Image 20	Pole	0.512	103774	36739	190020	53132.3	8301920
		Pole	0.512	110852	35077	253439	56756	8868131	8.58503e+06	4.87472e+06		0.866393	0.482074
		Background	0.512	46378.8	32605	75086	23746	3710308
LoKI-off	Image 1	Pole	0.512	70074.4	19111	147932	35878.1	5605956
250 nM		Pole	0.512	56281.3	21380	102744	28816	4502507	5.05423e+06	1.09179e+06	4.67917e+06	0.194045	0.10797
		Background	0.512	49530.6	31583	82678	25359.6	3962445
	Image 2	Pole	0.512	73449.4	38656	145214	37606.1	5875948
		Pole	0.512	63593.7	24251	108932	32559.9	5087492	5481720	2986571		0.530809	0.29535
		Background	0.512	31189.4	16284	50424	15969	2495149
	Image 3	Pole	0.512	105090	27435	183611	53806.2	8407221
		Pole	0.512	97150.9	30986	239225	49741.3	7772072	8.08965e+06	5.20238e+06		0.924628	0.514477
		Background	0.512	36090.9	23944	42985	18478.5	2887269
	Image 4	Pole	0.512	111837	38992	236680	57260.6	8946970
		Pole	0.512	136709	64666	296216	69995.2	10936757	9.94186e+06	4.80171e+06		0.853418	0.474855
		Background	0.512	64251.9	50106	89063	32897	5140149
	Image 5	Pole	0.512	167843	77258	325492	85935.8	13427470
		Pole	0.512	153371	74993	256982	78526	12269685	1.28486e+07	5.71963e+06		1.01656	0.56563
		Background	0.512	89111.9	65579	102232	45625.3	7128948
	Image 6	Pole	0.512	157653	75808	259817	80718.5	12612264
		Pole	0.512	163754	58980	277041	83841.8	13100286	12856275	10095681		1.79432	0.99839
		Background	0.512	34507.4	22022	46782	17667.8	2760594
	Image 7	Pole	0.512	44237.6	20070	102145	22649.7	3539009
		Pole	0.512	24804.7	9514	46086	12700	1984378	2.76169e+06	1.9221e+06		0.341619	0.190082
		Background	0.512	10494.9	5904	17923	5373.38	839591
	Image 8	Pole	0.512	87337.2	32918	152240	44716.6	6986973
		Pole	0.512	83190.7	41009	119306	42593.6	6655254	6.82111e+06	4.94271e+06		0.878478	0.488799
		Background	0.512	23480	15212	34897	12021.8	1878399
	Image 9	Pole	0.512	86698.4	31285	142809	44389.6	6935872
		Pole	0.512	103771	37220	176899	53130.5	8301644	7618758	5807370		1.03215	0.574307
		Background	0.512	22642.3	16289	32068	11592.9	1811388
	Image 10	Pole	0.512	97826.5	43935	159578	50087.2	7826121
		Pole	0.512	106914	49606	148571	54740.1	8553147	8189634	6230877		1.10743	0.616188
		Background	0.512	24484.5	15712	39692	12536	1958757
	Image 11	Pole	0.512	64275.7	26625	100045	32909.1	5142053
		Pole	0.512	71825.2	40982	110242	36774.5	5746014	5.44403e+06	2.67009e+06		0.47456	0.264052
		Background	0.512	34674.3	27706	41563	17753.2	2773944
LoKI-off	Image 1	Pole	0.512	218101	113327	312291	111668	17448061
DMSO		Pole	0.512	282836	126868	399443	144812	22626855	20037458	11794024	1.0112e+07	2.09617	1.16634
		Background	0.512	103043	56998	168525	52758	8243434
	Image 2	Pole	0.512	219756	117715	353221	112515	17580452
		Pole	0.512	114793	39061	190910	58774.3	9183478	13381965	7047657		1.25259	0.696962
		Background	0.512	79178.9	58446	139947	40539.6	6334308
	Image 3	Pole	0.512	84167.4	20002	173773	43093.7	6733389
		Pole	0.512	91401.4	39703	139993	46797.5	7312109	7022749	4169953		0.741134	0.412378
		Background	0.512	35659.9	21045	69300	18257.9	2852796
	Image 4	Pole	0.512	232554	163231	293738	119068	18604316
		Pole	0.512	273018	174376	353002	139785	21841423	2.02229e+07	8.70107e+06		1.54646	0.860472
		Background	0.512	144023	119606	173181	73739.5	11521804
	Image 5	Pole	0.512	228513	135617	316647	116999	18281022
		Pole	0.512	221109	133486	328667	113208	17688710	17984866	7939537		1.41111	0.785163
		Background	0.512	125567	96720	146538	64290.1	10045329
	Image 6	Pole	0.512	241335	117071	389210	123564	19306798
		Pole	0.512	210291	139371	276445	107669	16823270	18065034	7325571		1.30199	0.724446
		Background	0.512	134243	85637	179688	68732.6	10739463
	Image 7	Pole	0.512	314580	168069	485092	161065	25166419
		Pole	0.512	278148	152864	434336	142412	22251863	23709141	14572726		2.59004	1.44114
		Background	0.512	114205	86116	141180	58473.1	9136415
	Image 8	Pole	0.512	458577	292386	590915	234791	36686160
		Pole	0.512	413377	252251	543399	211649	33070166	34878163	17562999		3.12151	1.73685
		Background	0.512	216440	185191	246236	110817	17315164
	Image 9	Pole	0.512	166726	79945	282494	85363.9	13338111
		Pole	0.512	178949	107383	275278	91622	14315936	1.3827e+07	8.55996e+06		1.52138	0.846518
		Background	0.512	65838.3	52634	83604	33709.2	5267065
	Image 10	Pole	0.512	274441	109718	472340	140514	21955314
		Pole	0.512	238994	100760	448307	122365	19119532	20537423	13446167		2.38981	1.32973
		Background	0.512	88640.7	65495	129450	45384	7091256
LoKI-on	Image 1	Pole	0.512	121881	32773	206618	62402.9	9750458
100 nM		Pole	0.512	116600	51004	200066	59699	9327971	9.53921e+06	4.61309e+06	2.98925e+06	0.819893	0.456201
		Background	0.512	61576.6	45745	102526	31527.2	4926124
	Image 2	Pole	0.512	114344	68637	165492	58544.2	9147529
		Pole	0.512	123949	80745	181040	63461.9	9915929	9531729	3987406		0.708689	0.394326
		Background	0.512	69304	54233	99224	35483.7	5544323
	Image 3	Pole	0.512	124594	74982	153526	63792	9967501
		Pole	0.512	127481	82569	193099	65270.1	10198451	10082976	4923033		0.87498	0.486852
		Background	0.512	64499.3	56199	81404	33023.6	5159943
	Image 4	Pole	0.512	123314	74120	176880	63136.8	9865124
		Pole	0.512	120477	74512	177955	61684.2	9638160	9751642	1615244		0.28708	0.159736
		Background	0.512	101705	83254	133210	52072.9	8136398
	Image 5	Pole	0.512	134546	72223	239856	68887.3	10763647
		Pole	0.512	90275.7	42174	163914	46221.2	7222059	8992853	4689266		0.833432	0.463734
		Background	0.512	53794.8	34882	77628	27543	4303587
	Image 6	Pole	0.512	59178.4	27132	131863	30299.4	4734275
		Pole	0.512	88467.6	41400	139607	45295.4	7077405	5905840	1412719		0.251085	0.139708
		Background	0.512	56164	40621	74442	28756	4493121
	Image 7	Pole	0.512	122341	64343	191986	62638.6	9787278
		Pole	0.512	97841.6	56023	136386	50094.9	7827329	8.8073e+06	3.08911e+06		0.549034	0.305491
		Background	0.512	71477.4	42709	96504	36596.4	5718192
	Image 8	Pole	0.512	117456	67992	170976	60137.4	9396474
		Pole	0.512	92100.2	57101	122170	47155.3	7368018	8382246	2435379		0.432845	0.240841
		Background	0.512	74335.8	51151	103546	38059.9	5946867
	Image 9	Pole	0.512	96572.8	66950	144458	49445.3	7725823
		Pole	0.512	110525	66169	151075	56588.7	8841986	8.2839e+06	2.32779e+06		0.413722	0.230201
		Background	0.512	74451.4	57230	95040	38119.1	5956116
	Image 10	Pole	0.512	86567.6	46724	142600	44322.6	6925410
		Pole	0.512	96843.9	44951	139397	49584.1	7747513	7.33646e+06	2.2649e+06		0.402545	0.223982
		Background	0.512	63394.5	47679	87228	32458	5071560
	Image 11	Pole	0.512	66068	42785	99917	33826.8	5285437
		Pole	0.512	53894.1	34430	69345	27593.8	4311530	4.79848e+06	1.45764e+06		0.259069	0.14415
		Background	0.512	41760.6	36120	48320	21381.4	3340844
	Image 12	Pole	0.512	135908	84024	186742	69584.9	10872643
		Pole	0.512	136626	73267	189100	69952.5	10930085	10901364	4352889		0.773647	0.430469
		Background	0.512	81855.9	66060	113587	41910.2	6548475
	Image 13	Pole	0.512	98255	51163	139790	50306.6	7860402
		Pole	0.512	79878.3	46341	115266	40897.7	6390267	7.12533e+06	3.0902e+06		0.549227	0.305598
		Background	0.512	50439.2	35245	79396	25824.9	4035137
	Image 14	Pole	0.512	125495	51456	212119	64253.4	10039593
		Pole	0.512	79775.3	53283	105786	40845	6382026	8.21081e+06	2.83899e+06		0.50458	0.280756
		Background	0.512	67147.7	35831	96440	34379.6	5371816
	Image 15	Pole	0.512	109004	59300	179476	55810	8720316
		Pole	0.512	151941	99633	208462	77793.9	12155298	10437807	3666066		0.651577	0.362547
		Background	0.512	84646.8	71654	97391	43339.1	6771741
	Image 16	Pole	0.512	85978	59042	124113	44020.7	6878242
		Pole	0.512	90510.1	53857	142178	46341.2	7240810	7059526	2489373		0.442441	0.246181
		Background	0.512	57126.9	42822	71490	29249	4570153
	Image 17	Pole	0.512	134550	84775	200356	68889.8	10764033
		Pole	0.512	79777.6	43660	139060	40846.1	6382205	8573119	2452830		0.435946	0.242567
		Background	0.512	76503.6	65256	93179	39169.8	6120289
	Image 18	Pole	0.512	100085	51596	178452	51243.7	8006825
		Pole	0.512	90917.9	52845	138660	46550	7273435	7640130	1920758		0.34138	0.189949
		Background	0.512	71492.1	52198	99812	36604	5719372
	Image 19	Pole	0.512	80798.6	43628	122468	41368.9	6463887
		Pole	0.512	112267	76991	159682	57480.6	8981339	7722613	1292431		0.229706	0.127812
		Background	0.512	80377.3	56819	118350	41153.2	6430182
	Image 20	Pole	0.512	110889	59646	183995	56775	8871089
		Pole	0.512	93854.6	39055	192494	48053.6	7508371	8189730	4865920		0.864829	0.481204
		Background	0.512	41547.6	26099	61081	21272.4	3323810
LoKI-off	Image 1	Pole	0.512	147869	73479	233163	75709	11829533
100 nM		Pole	0.512	190852	108745	302178	97716.4	15268182	1.35489e+07	5.24081e+06	5.44542e+06	0.931458	0.518278
		Background	0.512	103851	88436	120597	53171.5	8308052
	Image 2	Pole	0.512	68386.6	38125	102349	35013.9	5470928
		Pole	0.512	47193.4	26710	75050	24163	3775475	4.6232e+06	2.33073e+06		0.414245	0.230492
		Background	0.512	28655.9	23439	36237	14671.8	2292473
	Image 3	Pole	0.512	135976	53816	240938	69619.7	10878078
		Pole	0.512	129921	48519	212856	66519.7	10393708	10635893	7188153		1.27756	0.710856
		Background	0.512	43096.8	31696	58859	22065.5	3447740
	Image 5	Pole	0.512	40857.9	17780	64096	20919.2	3268629
		Pole	0.512	31876.8	11899	50869	16320.9	2550143	2909386	1767344		0.314113	0.174777
		Background	0.512	14275.5	8202	19330	7309.07	1142042
	Image 6	Pole	0.512	177404	119853	238113	90830.8	14192309
		Pole	0.512	146825	82197	227592	75174.5	11746013	12969161	7444148		1.32306	0.736172
		Background	0.512	69062.7	51837	105693	35360.1	5525013
	Image 7	Pole	0.512	184366	68756	311489	94395.6	14749316
		Pole	0.512	153055	50306	252103	78364.2	12244412	13496864	8701315		1.5465	0.860497
		Background	0.512	59944.4	37948	99931	30691.5	4795549
LoKI-on	Image 1	Pole	0.512	64866.3	41304	120251	33211.6	5189306
500 nM		Pole	0.512	88407.5	68769	120201	45264.6	7072597	6.13095e+06	0	940936	0	0
		Background	0.512	80063.7	66568	105670	40992.6	6405099
	Image 2	Pole	0.512	65989.7	36288	120299	33786.7	5279179
		Pole	0.512	80689.6	40282	141763	41313.1	6455168	5.86717e+06	0		0	0
		Background	0.512	76828.4	50260	103922	39336.1	6146271
	Image 3	Pole	0.512	50780.3	38176	83389	25999.5	4062428
		Pole	0.512	80671.8	46687	119917	41304	6453746	5258087	1043862		0.185528	0.10323
		Background	0.512	52677.8	33388	86085	26971	4214225
	Image 4	Pole	0.512	48152.3	11239	108721	24654	3852186
		Pole	0.512	71805.5	37539	131699	36764.4	5744441	4.79831e+06	940876		0.167224	0.0930459
		Background	0.512	48218	24634	86373	24687.6	3857437
	Image 5	Pole	0.512	139505	106096	192430	71426.6	11160413
		Pole	0.512	134949	103235	174983	69093.9	10795925	10978169	908492		0.161468	0.0898433
		Background	0.512	125871	84786	153640	64445.9	10069677
	Image 6	Pole	0.512	46849.6	30569	100448	23987	3747967
		Pole	0.512	48231.2	20584	103503	24694.4	3858500	3.80323e+06	596758		0.106063	0.059015
		Background	0.512	40080.9	27682	61907	20521.4	3206476
	Image 7	Pole	0.512	87399.5	66130	105604	44748.5	6991959
		Pole	0.512	68626.9	50587	104552	35137	5490152	6.24106e+06	622114		0.110569	0.0615225
		Background	0.512	70236.8	57340	93735	35961.2	5618942
	Image 8	Pole	0.512	81045.6	55749	108073	41495.4	6483650
		Pole	0.512	72566.4	46077	121275	37154	5805316	6144483	941980		0.16742	0.093155
		Background	0.512	65031.3	55509	77454	33296	5202503
	Image 9	Pole	0.512	105030	92577	124536	53775.4	8402406
		Pole	0.512	97534.6	56571	162420	49937.7	7802768	8102587	1958059		0.34801	0.193638
		Background	0.512	76806.6	60606	96570	39325	6144528
	Image 10	Pole	0.512	76012.6	37740	128859	38918.5	6081008
		Pole	0.512	90202	46068	145285	46183.4	7216163	6.64859e+06	106668		0.0189582	0.0105486
		Background	0.512	81774	53603	102283	41868.3	6541918
	Image 11	Pole	0.512	48748	33473	72504	24959	3899842
		Pole	0.512	76923.9	51836	99471	39385	6153909	5.02688e+06	0		0	0
		Background	0.512	70389	62511	78559	36039.1	5631117
	Image 12	Pole	0.512	191145	160341	221793	97866.1	15291582
		Pole	0.512	104818	79375	131451	53666.6	8385404	11838493	5123993		0.910697	0.506726
		Background	0.512	83931.2	66573	102531	42972.8	6714500
	Image 13	Pole	0.512	121757	74062	191840	62339.4	9740539
		Pole	0.512	85207.4	48398	139349	43626.2	6816590	8.27856e+06	875880		0.155672	0.0866181
		Background	0.512	92533.6	63899	125600	47377.2	7402685
	Image 14	Pole	0.512	60143.8	35037	88883	30793.6	4811503
		Pole	0.512	70686.3	57006	87135	36191.4	5654904	5.2332e+06	0		0	0
		Background	0.512	71492.7	60547	82807	36604.3	5719419
	Image 15	Pole	0.512	153363	115549	186886	78521.8	12269030
		Pole	0.512	110394	91707	134851	56521.5	8831492	10550261	1683677		0.299243	0.166503
		Background	0.512	110832	87805	139995	56746.1	8866584
	Image 16	Pole	0.512	118324	85527	155628	60581.8	9465912
		Pole	0.512	92689.8	47501	122660	47457.2	7415183	8.44055e+06	1.41381e+06		0.25128	0.139816
		Background	0.512	87834.2	69179	108815	44971.1	7026735
	Image 17	Pole	0.512	87065.8	68295	104653	44577.7	6965261
		Pole	0.512	114310	71654	145408	58526.8	9144818	8.05504e+06	1.11682e+06		0.198495	0.110446
		Background	0.512	86727.7	56056	117560	44404.6	6938217
	Image 18	Pole	0.512	106494	80350	139317	54525.1	8519543
		Pole	0.512	94890.9	65395	154032	48584.1	7591271	8055407	0		0	0
		Background	0.512	102840	78463	145505	52654.1	8227200
	Image 19	Pole	0.512	87123.6	57299	129923	44607.3	6969884
		Pole	0.512	82057.4	64648	103249	42013.4	6564592	6767238	964304		0.171388	0.0953627
		Background	0.512	72536.7	54388	93369	37138.8	5802934
	Image 20	Pole	0.512	56661.4	42314	76648	29010.6	4532912
		Pole	0.512	51990.7	30513	81714	26619.2	4159257	4.34608e+06	521426		0.0926741	0.0515653
		Background	0.512	47808.2	37153	64510	24477.8	3824658
LoKI-off	Image 1	Pole	0.512	108594	47848	184777	55599.9	8687483
500 nM		Pole	0.512	125953	69539	203314	64487.7	10076207	9381845	5424599	2.42947e+06	0.964124	0.536453
		Background	0.512	49465.6	38365	60230	25326.4	3957246
	Image 2	Pole	0.512	65488.8	25804	135037	33530.3	5239102
		Pole	0.512	78571.7	31854	149301	40228.7	6285737	5.76242e+06	3.2364e+06		0.575211	0.320056
		Background	0.512	31575.3	20223	53745	16166.5	2526021
	Image 3	Pole	0.512	101664	49851	190646	52052.1	8133148
		Pole	0.512	100771	57140	144657	51594.8	8061691	8.09742e+06	4.45746e+06		0.792233	0.44081
		Background	0.512	45499.5	35938	59710	23295.8	3639961
	Image 4	Pole	0.512	71542.6	46303	86931	36629.8	5723404
		Pole	0.512	65971.5	39284	105010	33777.4	5277719	5.50056e+06	1.95619e+06		0.347677	0.193453
		Background	0.512	44304.7	36761	53664	22684	3544373
	Image 5	Pole	0.512	32092.1	19272	56064	16431.2	2567370
		Pole	0.512	30758.5	13871	49303	15748.4	2460683	2.51403e+06	984634		0.175001	0.0973732
		Background	0.512	19117.4	11223	36420	9788.11	1529392
	Image 6	Pole	0.512	126653	90642	178436	64846.2	10132211
		Pole	0.512	136773	87305	179935	70027.7	10941832	1.0537e+07	3.85954e+06		0.685964	0.381681
		Background	0.512	83468.5	69546	99719	42735.9	6677480
	Image 7	Pole	0.512	101348	48854	178699	51890.3	8107864
		Pole	0.512	76483.1	42636	114140	39159.3	6118648	7113256	2406181		0.427655	0.237954
		Background	0.512	58838.4	44747	70839	30125.3	4707075
	Image 8	Pole	0.512	71490.5	51877	96874	36603.1	5719242
		Pole	0.512	81942.9	63087	111513	41954.8	6555431	6.13734e+06	493204		0.0876582	0.0487743
		Background	0.512	70551.6	57959	85466	36122.4	5644132
	Image 9	Pole	0.512	126147	82911	180110	64587.2	10091749
		Pole	0.512	122516	109170	144118	62728.1	9801265	9946507	704698		0.125247	0.0696895
		Background	0.512	115523	90133	140941	59147.6	9241809
	Image 10	Pole	0.512	86148.3	55775	122740	44107.9	6891864
		Pole	0.512	103764	69519	157533	53127.4	8301151	7.59651e+06	1.55653e+06		0.276646	0.15393
		Background	0.512	75499.7	59681	103908	38655.8	6039974
	Image 11	Pole	0.512	112722	81392	162494	57713.9	9017795
		Pole	0.512	117115	85373	180982	59962.8	9369187	9193491	728700		0.129513	0.0720631
		Background	0.512	105810	86222	129075	54174.7	8464791
	Image 12	Pole	0.512	45064.5	28048	61598	23073	3605157
		Pole	0.512	44087.6	27626	88694	22572.8	3527006	3.56608e+06	882324		0.156817	0.0872555
		Background	0.512	33547	18105	56785	17176	2683757
	Image 13	Pole	0.512	61267.8	26468	94261	31369.1	4901423
		Pole	0.512	61048.9	29253	91178	31257	4883911	4892667	4892667		0.869583	0.483849

## Sheet: pT210Plk1_compiled1-3
	DMSO LoKI-off	DMSO LoKI-on	100 nM LoKI-off	100 nM LoKI-on	250 nM LoKI-off	250 nM LoKI-on	500 nM LoKI-off	500 nM LoKI-on
Exp 1	1.01468	0.873432	0.698657	0.175449	1.05553	0.116562	0	0.529353		U2OS SNAP-PACT cells were treated with CLP-BI2536 for 4 hr
	1.09674	1.21415	1.128	0.161058	0.841376	0.181868	0.486432	0.344934
	1.0843	1.08507	0.72207	0.633367	0.388194	0	0.80971	0
	0.81477	1.00304	0.832235	0.435085	0.38523	0	0.0589579	0
	1.08414	0.571669	0.479572	0.178299	0.616581	0.274131	0.223032	0.0197504
	1.17068	1.30935	0.764927	0.283017	0.573238	0.375504	0.105568	0.0246752
	0.208264	1.02443	0.820779	0.441494	0.687107	0.135378	0.292728	0.0928355
	1.42859	1.01023	1.37143	0.159934	0.626234	0.277493	0.244506	0.122244
	0.999027	0.933866	0.635732	0.254316	0.93668	0.405472	0.21326	0.194135
	0.813509	0.945411	1.11381	0.353511	0.496557	0.494416	0.451472	0
	0.457631	0.436578	0.591565	0.007144	0.598251	0.083819	0.324626	0
	1.15048	0.883966	0.655563	0.484127	0.515141	0	0.479486	0.0199944
	1.54244	1.51062	0.687826	0.323061	0.563402	0.251076	0.701497	0.0706651
	1.13475	0.705713	0.944865	0	0.786238	0.318253	0.187613	0.155349
		1.49681	0.8133	0.67869	0.0484373	0.439852	0.394136	0.0991628
		0.538629	1.05159	0.484197	0.38489	0.038987	0.200572	0.206603
		1.33111	0.0715797	0.498266	0.585111	0	0.187168	0.19508
		0.757023	1.0825	0.423436	0.964804	0.282052	0	0.30427
		1.31453	0	0.42005	0.573419	0.220161	0	0.165154
		1.05438	0.250253	0.109567		0	0	0.324217
			2.22936
Exp 2	0.409523	1.30927	0.46125	0	0.312122	0	0.0547291	0.39623
	1.50728	1.40318	0.250044	1.05629	0.4015	0	0.62474	0.659808
	1.30346	1.23358	0.165819	0.429355	0.800756	0.145886	0.360249	0.513855
	0.613013	1.35782	0.60434	0.961887	0.443587	0	0.00877309	0.401167
	0.759449	1.1594	0.686788	0.460282	1.21454	0.0145109	0.0283006	0
	0.873219	0.995966	0.579792	0.342102	0.920548	0.366151	0.0783434	0.0815096
	1.49182	0.58579	0.844964	0.697323	0.758209	0	0.686522	0.538392
	0.596859	0.944401	0.509821	0.254157	0.818183	0.211518	0.358144	0
	1.00099	0.607896	0.567684	0.080086	0.641262	0.0468578	0.199225	0.165438
	1.15924	0.902919	0.221705	1.47723	0.544273	0.50375	0	0
	1.11411	1.1603	0.74284	0.794732	0.573364	0.265725	0.184155	0.707249
	0.83218	0.870068	0.203055	0.635397	0.673139	0.766144	0	0.173333
	0.91046	0.784366	0.317568	0.321434	0.576272	0.265281	0.0944099	0.0712539
	1.79379	1.02356	0.55645	1.03726	0.797156	0.0359288	0.249136	0.329198
	0.806851	0.889184	0.288061	0.361138	0.935904	0.787629	0.167101	0.18989
	0.797723	1.14761	0.160996	0.351447	0.286599	0.129723	0.33648	0.0730655
	0.886904	1.323	1.25826	0.179584	0.228975	0.171007	0.312988	0
	0.660154	0.561125	0.769806	0.621746	0.404442	0.509699	0.226432	0.701015
	1.2736	0.812375	0.739491	0.268165	0.42136	0.195419	0.180344	0
	1.20938	0.928186				0.434017	0.434248	0.934517
Exp 3	1.16634	1.0615	0.518278	0.819893	0.10797	0.0146784	0.536453	0
	0.696962	0.947479	0.230492	0.708689	0.29535	0.125242	0.320056	0
	0.412378	1.17354	0.710856	0.87498	0.514477	0.168169	0.44081	0.185528
	0.860472	1.12631	0.174777	0.28708	0.474855	0.361042	0.193453	0.167224
	0.785163	1.40122	0.736172	0.833432	0.56563	0	0.0973732	0.161468
	0.724446	0.830238	0.860497	0.251085	0.99839	0.477039	0.381681	0.106063
	1.44114	1.20252		0.549034	0.190082	0.231979	0.237954	0.110569
	1.73685	1.51964		0.432845	0.488799	0.251889	0.0487743	0.16742
	0.846518	0.653506		0.413722	0.574307	0.0922498	0.0696895	0.34801
	1.32973	0.41198		0.402545	0.616188		0.15393	0.0189582
		0.555497		0.259069	0.264052		0.0720631	0
		1.9315		0.773647			0.0872555	0.910697
		0.688185		0.549227			0.24246	0.155672
		0.903115		0.50458				0
		0.946119		0.651577				0.299243
		0.828473		0.442441				0.25128
		1.12381		0.435946				0.198495
		1.38863		0.34138				0
		0.440341		0.229706				0.171388
		0.866393		0.864829				0.0926741
