# Supplementary material for: Subcellular drug targeting illuminates local kinase action
Source: eLife. 2019 Dec 24;8:e52220. doi: 10.7554/eLife.52220 (PMC6930117; doi:10.7554/eLife.52220)
Supplement: Figure 3—source data 1. [file elife-52220-fig3-data1.xlsx]

## Sheet: Spindle profiles_U2OS
U2OS	DMSO										Ratio of Total			% of Total
				Bipolar	Odd	Mono	Total				Bipolar	Odd	Mono	Bipolar	Odd	Mono
		Ex1	LoKI-on	104	16	2	122		DMSO	LoKI-on	0.852459	0.131148	0.0163934	85.2459	13.1148	1.63934
			LoKI-off	19	1	2	22			LoKI-off	0.863636	0.0454545	0.0909091	86.3636	4.54545	9.09091
		Ex2	LoKI-on	69	10	2	81			LoKI-on	0.851852	0.123457	0.0246914	85.1852	12.3457	2.46914
			LoKI-off	68	8	6	82			LoKI-off	0.829268	0.097561	0.0731707	82.9268	9.7561	7.31707
		Ex3	LoKI-on	64	10	2	76			LoKI-on	0.842105	0.131579	0.0263158	84.2105	13.1579	2.63158
			LoKI-off	123	24	9	156			LoKI-off	0.788462	0.153846	0.0576923	78.8462	15.3846	5.76923
	250 nM CLP-BI								250 nM CLP-BI	LoKI-on	0.597786	0.339483	0.0627306	59.7786	33.9483	6.27306
				Bipolar	Odd	Mono	Total			LoKI-off	0.752688	0.198925	0.0483871	75.2688	19.8925	4.83871
		Ex1	LoKI-on	162	92	17	271			LoKI-on	0.650307	0.202454	0.147239	65.0307	20.2454	14.7239
			LoKI-off	140	37	9	186			LoKI-off	0.727273	0.214286	0.0584416	72.7273	21.4286	5.84416
		Ex2	LoKI-on	106	33	24	163			LoKI-on	0.546875	0.359375	0.09375	54.6875	35.9375	9.375
			LoKI-off	112	33	9	154			LoKI-off	0.693617	0.27234	0.0340426	69.3617	27.234	3.40426
		Ex3	LoKI-on	140	92	24	256
			LoKI-off	163	64	8	235		Average %
											Bipolar	Odd	Mono	SEM	SEM	SEM	Total cells
									DMSO	LoKI-on	84.8805	12.8728	2.24669	0.335464	0.263843	0.30727	279
									DMSO	LoKI-off	82.7122	9.89539	7.3924	2.17276	3.12977	0.959625	260
									250 nM	LoKI-on	59.8323	30.0437	10.124	2.98594	4.93271	2.46813	690
									250 nM	LoKI-off	72.4526	22.8517	4.69571	1.71076	2.23559	0.707959	575

## Sheet: Spindle profiles_hTERT-RPE
hTERT-RPE	DMSO										Ratio of Total				Average
				Bipolar	Odd	Mono					Bipolar	Odd	Mono		Bipolar	Odd	Mono	SEM	SEM	SEM
		Ex1	LoKI-on	11	1	3	15		DMSO	LoKI-on	0.733333	0.0666667	0.2		0.812613	0.100601	0.0867868	0.0405038	0.0197674	0.0566359
			LoKI-off	23	6	0	29			LoKI-off	0.793103	0.206897	0		0.822926	0.141038	0.036036	0.0215833	0.0364395	0.036036
		Ex2	LoKI-on	31	5	1	37			LoKI-on	0.837838	0.135135	0.027027		0.443082	0.329852	0.227066	0.0547177	0.0525347	0.0139992
			LoKI-off	30	3	4	37			LoKI-off	0.810811	0.0810811	0.108108		0.688567	0.187061	0.124372	0.0641039	0.053233	0.0147981
		Ex3	LoKI-on	26	3	1	30			LoKI-on	0.866667	0.1	0.0333333
			LoKI-off	32	5	0	37			LoKI-off	0.864865	0.135135	0
	250 nM CLP-BI								250 nM CLP-BI	LoKI-on	0.333333	0.407407	0.259259
				Bipolar	Odd	Mono				LoKI-off	0.571429	0.261905	0.166667
		Ex1	LoKI-on	9	11	7	27			LoKI-on	0.517241	0.241379	0.241379
			LoKI-off	24	11	7	42			LoKI-off	0.853659	0.0487805	0.097561
		Ex2	LoKI-on	45	21	21	87			LoKI-on	0.366667	0.433333	0.2
			LoKI-off	35	2	4	41			LoKI-off	0.604651	0.27907	0.116279
		Ex3	LoKI-on	11	13	6	30			LoKI-on	0.555085	0.237288	0.207627
			LoKI-off	26	12	5	43			LoKI-off	0.724528	0.158491	0.116981
		Ex4	LoKI-on	131	56	49	236
			LoKI-off	192	42	31	265		Average %
											Bipolar	Odd	Mono	SEM	SEM	SEM	Total cells
									DMSO	LoKI-on	81.2613	10.0601	8.67868	4.05038	1.97674	5.66359	82
									DMSO	LoKI-off	82.2926	14.1038	3.6036	2.15833	3.64395	3.6036	103
									250 nM	LoKI-on	44.3082	32.9852	22.7066	5.47177	5.25347	1.39992	380
									250 nM	LoKI-off	68.8567	18.7061	12.4372	6.41039	5.3233	1.47981	391

## Sheet: Spindle profiles_HeLa
HeLa	DMSO										Ratio of Total			% of Total
				Bipolar	Odd	Mono					Bipolar	Odd	Mono	Bipolar	Odd	Mono
		Ex1	LoKI-on	221	173	9	403		DMSO	LoKI-on	0.548387	0.42928	0.0223325	54.8387	42.928	2.23325
			LoKI-off	31	43	15	89			LoKI-off	0.348315	0.483146	0.168539	34.8315	48.3146	16.8539
		Ex2	LoKI-on	176	156	18	350			LoKI-on	0.502857	0.445714	0.0514286	50.2857	44.5714	5.14286
			LoKI-off	154	184	12	350			LoKI-off	0.44	0.525714	0.0342857	44	52.5714	3.42857
		Ex3	LoKI-on	6	0	15	21
			LoKI-off	29	3	60	92			LoKI-off	0.315217	0.0326087	0.652174	31.5217	3.26087	65.2174
		Ex 4	LoKI-on	18	20	0	38			LoKI-on	0.473684	0.526316	0	47.3684	52.6316	0
			LoKI-off	45	32	1	78			LoKI-off	0.576923	0.410256	0.0128205	57.6923	41.0256	1.28205
	250 nM CLP-BI								250 nM CLP-BI	LoKI-on	0.312187	0.639399	0.048414	31.2187	63.9399	4.8414
				Bipolar	Odd	Mono				LoKI-off	0.214286	0.78	0.00571429	21.4286	78	0.571429
		Ex1	LoKI-on	187	383	29	599			LoKI-on	0.394286	0.588571	0.0171429	39.4286	58.8571	1.71429
			LoKI-off	75	273	2	350			LoKI-off	0.325714	0.617143	0.0571429	32.5714	61.7143	5.71429
		Ex2	LoKI-on	138	206	6	350			LoKI-on	0.351429	0.588571	0.06	35.1429	58.8571	6
			LoKI-off	114	216	20	350			LoKI-off	0.148571	0.84	0.0114286	14.8571	84	1.14286
		Ex3	LoKI-on	123	206	21	350			LoKI-on	0.16	0.78	0.06	16	78	6
			LoKI-off	52	294	4	350			LoKI-off	0.357143	0.642857	0	35.7143	64.2857	0
		Ex 4	LoKI-on	56	273	21	350
			LoKI-off	125	225	0	350		Average %
											Bipolar	Odd	Mono	SEM	SEM	SEM	Total cells
	Coverslip had very few total cells to analyze. Exluded this replicate in quantification.								DMSO	LoKI-on	50.8309	46.7103	2.4587	2.17365	2.99838	1.48889	791
									DMSO	LoKI-off	42.0114	36.2931	21.6955	5.85541	11.2658	14.9108	609
									250 nM	LoKI-on	30.4475	64.9135	4.63892	5.09927	4.52367	1.0124	1649
									250 nM	LoKI-off	26.1429	72	1.85714	4.85224	5.36428	1.30671	1400
