# Supplementary material for: Subcellular drug targeting illuminates local kinase action
Source: eLife. 2019 Dec 24;8:e52220. doi: 10.7554/eLife.52220 (PMC6930117; doi:10.7554/eLife.52220)
Supplement: Figure 4—source data 1. [file elife-52220-fig4-data1.xlsx]

## Sheet: PACT_CLPMLN_Dose-res
U2OS SNAP-PACT cells treated with CLP-MLN8237 for 4 hr followed by CLP-rhodamine
	CLP-MLN8237
	EX1
			WB		Gel		Rhodamine Labeling		%Drug		Ex 1-3
	1	DMSO	16.954	1	34.578	34.578	1	0	0			% Rhodamine Labeling	% CLP-MLN8237 Labeling	SEM
	2	50 nM	38.408	2.26542	38.73	17.0961	0.494422	0.505578	50.5578		DMSO	100	0	0
	3	100 nM	25.618	1.51103	21.851	14.461	0.418214	0.581786	58.1786		50 nM	78.037	21.963	14.3617
	4	250 Nm	19.02	1.12186	4.841	4.31516	0.124795	0.875205	87.5205		100 nM	51.9163	48.0837	5.0499
	EX2										250 nM	19.3165	80.6835	4.18019
			WB		Gel		Rhodamine Labeling		%Drug
	1	DMSO	27.369	1	39.405	39.405	1	0	0
	2	50 nM	24.701	0.902517	32.001	35.4575	0.899822	0.100178	10.0178
	3	100 nM	28.751	1.0505	23.467	22.339	0.566908	0.433092	43.3092
	4	250 Nm	19.178	0.70072	5.127	7.31676	0.185681	0.814319	81.4319
	EX3
			WB		Gel		Rhodamine Labeling		%Drug
	1	DMSO	35.441	1	47.189	47.189	1	0	0
	2	50 nM	22.709	0.640755	28.63	44.6817	0.946866	0.053134	5.3134
	3	100 nM	22.757	0.642109	17.343	27.0094	0.572367	0.427633	42.7633
	4	250 Nm	19.093	0.538726	6.839	12.6948	0.269019	0.730981	73.0981
