# Supplementary material for: Subcellular drug targeting illuminates local kinase action
Source: eLife. 2019 Dec 24;8:e52220. doi: 10.7554/eLife.52220 (PMC6930117; doi:10.7554/eLife.52220)
Supplement: Figure 6—figure supplement 1—source data 1. [file elife-52220-fig6-figsupp1-data1.xlsx]

## Sheet: Mis12_CLPBI_Dose-res
U2OS SNAP-Mis12 cells treated with CLP-BI2536 for 4 hr followed by CLP-rhodamine
		Mis12 Act 3	Gel	WB	Normalization	Normalized Gel Signal	Normalized to DMSO	% Rhodamine Labeling	% CLP-BI Labeling			Ex 1-3
	Exp 1	DMSO	7296.63	2129.98	1	7296.63	1	100	0			% Rhodamine Labeling	% CLP-BI Labeling	SEM
		50 nM	9034.43	3105.28	1.45789	6196.93	0.849287	84.9287	15.0713			100	0	0
		100 nM	6476.75	3034.2	1.42452	4546.62	0.623112	62.3112	37.6888			89.2877	10.7123	5.38699
		250 nM	5269.29	4668.52	2.19181	2404.08	0.329478	32.9478	67.0522			81.2123	18.7877	10.88
		500 nM	3046.63	4997.69	2.34635	1298.45	0.177953	17.7953	82.2047			48.1583	51.8417	11.482
		Mis12 Act 3	Gel	WB	Normalization	Normalized Gel Signal	Normalized to DMSO	% Rhodamine Labeling	% CLP-BI Labeling			33.2467	66.7533	12.1541
	Exp 2	DMSO	6735.68	4211.23	1	6735.68	1	100	0
		50 nM	8530.58	6430.88	1.52708	5586.2	0.829345	82.9345	17.0655
		100 nM	8036.92	6178.59	1.46717	5477.84	0.813256	81.3256	18.6744
		250 nM	2818.2	4311.76	1.02387	2752.48	0.408642	40.8642	59.1358
		500 nM	2609.22	6598.88	1.56697	1665.13	0.24721	24.721	75.279
		Mis12 Act 3	Gel	WB	Normalization	Normalized Gel Signal	Normalized to DMSO	% Rhodamine Labeling	% CLP-BI Labeling
	Exp 3	DMSO	10669.7	7228.93	1	10669.7	1	100	0
		50 nM	9952.58	6244.52	0.863823	11521.6	1.07984	107.984	0
		100 nM	6252.17	4062.52	0.56198	11125.2	1.04269	104.269	0
		250 nM	4246.39	4071.47	0.563218	7539.51	0.706628	70.6628	29.3372
		500 nM	3714.97	4398.47	0.608453	6105.6	0.572237	57.2237	42.7763
		Since CLP-rhodamine singal was above 100 the amount of drug labeling was below 0%, indicated value as 0
