# Supplementary material for: Subcellular drug targeting illuminates local kinase action
Source: eLife. 2019 Dec 24;8:e52220. doi: 10.7554/eLife.52220 (PMC6930117; doi:10.7554/eLife.52220)
Supplement: Figure 6—source data 1. [file elife-52220-fig6-data1.xlsx]

## Sheet: Mis12_CLPMLN_Dose-res
U2OS SNAP-Mis12 cells treated with CLP-MLN8237 for 4 hr followed by CLP-rhodamine
											Ex 1-3
		Mis12 Act 3	Gel	WB	Normalization	Normalized Gel Signal	Normalized to DMSO	% Rhodamine Labeling	% CLP-MLN Labeling			% Rhodamine Labeling	% CLP-MLN8237 Labeling	SEM
3/11/19 Ex 1	Exp 1	DMSO	10174.2	3802.59	1	10174.2	1	100	0		DMSO	100	0	0
		25 nM	11601.4	5329.88	1.40165	8276.96	0.813525	81.3525	18.6475		25 nM	91.8826	8.11735	5.34492
		50 nM	9222.87	3592.4	0.944724	9762.51	0.959537	95.9537	4.04632		50 nM	91.847	8.15296	2.75251
		100 nM	5935.26	3890.22	1.02305	5801.55	0.570223	57.0223	42.9777		100 nM	67.5651	32.4349	6.55458
		250 nM	3933.34	3487.86	0.917233	4288.26	0.421485	42.1485	57.8515		250 nM	30.9717	69.0283	5.63117
		500 nM	1599.22	2507.26	0.659355	2425.43	0.293034	29.3034	70.6966		500 nM	20.0221	79.9779	6.36195
		Mis12 Act 3	Gel	WB	Normalization	Normalized Gel Signal	Normalized to DMSO	% Rhodamine Labeling	% CLP-MLN Labeling
3/11/19 Ex 2	Exp 2	DMSO	6924.87	3878.25	1	6924.87	1	100	0
		25 nM	7790.48	4566.05	1.17735	6616.96	0.955535	95.5535	4.44649
		50 nM	6323.79	3809.47	0.982266	6437.97	0.929687	92.9687	7.03128
		100 nM	4842.91	3408.05	0.878762	5511.07	0.795837	79.5837	20.4163
		250 nM	2055.02	4759.12	1.22713	1674.65	0.241832	24.1832	75.8168
		500 nM	1183.83	3027.4	0.78061	1516.55	0.229191	22.9191	77.0809
		Mis12 Act 3	Gel	WB	Normalization	Normalized Gel Signal	Normalized to DMSO	% Rhodamine Labeling	% CLP-MLN Labeling
3/18/19 Ex 2	Exp 3	DMSO	2822.64	2343.45	1	2822.64	1	100	0
		25 nM	4121	3464.98	1.47858	2787.13	0.987419	98.7419	1.25808
		50 nM	4529.59	4341.57	1.85264	2444.93	0.866187	86.6187	13.3813
		100 nM	3571.42	4486.52	1.9145	1865.46	0.660893	66.0893	33.9107
		250 nM	1340.98	4188.03	1.78713	750.358	0.265835	26.5835	73.4165
		500 nM	325.163	3485.57	1.48737	218.616	0.0784378	7.84378	92.1562
